# Supplementary material for: Nature of the E⋯E′ interactions (E, E′ = O, S, Se, and Te) at naphthalene 1,8-positions with fine details of the structures: experimental and theoretical investigations
Source: Royal Society of Chemistry journal article supplement (doi:10.1039/c9nj02198a), 2019-01-01
Supplement: c9nj02198a1.pdf [file c9nj02198a1.pdf]

## Supporting Information

### Nature of the E---E' Interactions (E, E' = O, S, Se, and Te) at Naphthalene 1,8-Positions with Fine Details of the Structures: Experimental and Theoretical Investigations

Satoko Hayashi,<sup>\*,1</sup> Manabu Uegaito,<sup>1</sup> Taro Nishide,<sup>1</sup> Eiichiro Tanaka,<sup>1</sup> Waro Nakanishi,<sup>\*,1</sup>  
Takahiro Sasamori,<sup>2</sup> Norihiro Tokitoh<sup>3</sup> and Mao Minoura<sup>4</sup>

<sup>1</sup> Faculty of Systems Engineering, Wakayama University, 930 Sakaedani, Wakayama 640-8510,  
Japan: E-mail: hayashi3@sys.wakayama-u.ac.jp and nakanisi@sys.wakayama-u.ac.jp

<sup>2</sup> In Graduate School of Natural Sciences, Nagoya City University, Yamanohata 1, Mizuho-cho,  
Mizuho-ku, Nagoya, Aichi 467-8501, Japan,

<sup>3</sup> Institute for Chemical Research, Kyoto University, Gokasho, Uji, Kyoto, 611-0011, Japan,

<sup>4</sup> Department of Chemistry, College of Science, Rikkyo University, Toshima-ku, Tokyo, 171-8501,  
Japan.

| Table of Contents                                                                                     | Pages |
|-------------------------------------------------------------------------------------------------------|-------|
| Survey of QTAIM, closely related to QTAIM dual functional analysis                                    | 2–4   |
| Criteria for classification of interactions: behavior of typical interactions elucidated by QTAIM-DFA | 5     |
| Characterization of interactions                                                                      | 5–7   |
| Additional figures and tables                                                                         | 8–13  |
| References                                                                                            | 14    |
| Computation information and geometries of compounds                                                   | 15–42 |

## Survey of QTAIM, closely related to QTAIM dual functional analysis (QTAIM-DFA)

The bond critical point (BCP; \*) is an important concept in QTAIM. The BCP of  $(\omega, \sigma) = (3, -1)$ <sup>S1</sup> is a point along the bond path (BP) at the interatomic surface, where charge density  $\rho(\mathbf{r})$  reaches a minimum. It is donated by  $\rho_b(\mathbf{r}_c)$ , so are other QTAIM functions, such as the total electron energy densities  $H_b(\mathbf{r}_c)$ , potential energy densities  $V_b(\mathbf{r}_c)$ , and kinetic energy densities  $G_b(\mathbf{r}_c)$  at the BCPs. A chemical bond or interaction between A and B is denoted by A–B, which corresponds to the BP between A and B in QTAIM. We will use A-\*–B for BP, where the asterisk emphasizes the presence of a BCP in A–B.

The sign of the Laplacian  $\rho_b(\mathbf{r}_c)$  ( $\nabla^2\rho_b(\mathbf{r}_c)$ ) indicates that  $\rho_b(\mathbf{r}_c)$  is depleted or concentrated with respect to its surrounding, since  $\nabla^2\rho_b(\mathbf{r}_c)$  is the second derivative of  $\rho_b(\mathbf{r}_c)$ .  $\rho_b(\mathbf{r}_c)$  is locally depleted relative to the average distribution around  $\mathbf{r}_c$  if  $\nabla^2\rho_b(\mathbf{r}_c) > 0$ , but it is concentrated when  $\nabla^2\rho_b(\mathbf{r}_c) < 0$ . Total electron energy densities at BCPs ( $H_b(\mathbf{r}_c)$ ) must be a more appropriate measure for weak interactions on the energy basis.<sup>S1–S8</sup>  $H_b(\mathbf{r}_c)$  are the sum of kinetic energy densities ( $G_b(\mathbf{r}_c)$ ) and potential energy densities ( $V_b(\mathbf{r}_c)$ ) at BCPs, as shown in Equation (2) (S1). Electrons at BCPs are stabilized when  $H_b(\mathbf{r}_c) < 0$ , therefore, interactions exhibit the covalent nature in this region, whereas they exhibit no covalency if  $H_b(\mathbf{r}_c) > 0$ , due to the destabilization of electrons at BCPs under the conditions.<sup>S1</sup> Equation (S2) represents the relation between  $\nabla^2\rho_b(\mathbf{r}_c)$  and  $H_b(\mathbf{r}_c)$ , together with  $G_b(\mathbf{r}_c)$  and  $V_b(\mathbf{r}_c)$ , which is closely related to the virial theorem.

$$H_b(\mathbf{r}_c) = G_b(\mathbf{r}_c) + V_b(\mathbf{r}_c) \quad (\text{S1})$$

$$(\hbar^2/8m)\nabla^2\rho_b(\mathbf{r}_c) = H_b(\mathbf{r}_c) - V_b(\mathbf{r}_c)/2 \quad (\text{S2})$$

$$= G_b(\mathbf{r}_c) + V_b(\mathbf{r}_c)/2 \quad (\text{S2}')$$

Interactions are classified by the signs of  $\nabla^2\rho_b(\mathbf{r}_c)$  and  $H_b(\mathbf{r}_c)$ . Interactions in the region of  $\nabla^2\rho_b(\mathbf{r}_c) < 0$  are called shared-shell (SS) interactions and they are closed-shell (CS) interactions for  $\nabla^2\rho_b(\mathbf{r}_c) > 0$ .  $H_b(\mathbf{r}_c)$  must be negative when  $\nabla^2\rho_b(\mathbf{r}_c) < 0$ , since  $H_b(\mathbf{r}_c)$  are larger than  $(\hbar^2/8m)\nabla^2\rho_b(\mathbf{r}_c)$  by  $V_b(\mathbf{r}_c)/2$  with negative  $V_b(\mathbf{r}_c)$  at all BCPs (Equation (S2)). Consequently,  $\nabla^2\rho_b(\mathbf{r}_c) < 0$  and  $H_b(\mathbf{r}_c) < 0$  for the SS interactions. The CS interactions are especially called *pure* CS interactions for  $H_b(\mathbf{r}_c) > 0$  and  $\nabla^2\rho_b(\mathbf{r}_c) > 0$ , since electrons at BCPs are depleted and destabilized under the conditions.<sup>S1a</sup> Electrons in the intermediate region between SS and *pure* CS, which belong to CS, are locally depleted but stabilized at BCPs, since  $\nabla^2\rho_b(\mathbf{r}_c) > 0$  but  $H_b(\mathbf{r}_c) < 0$ .<sup>S1a</sup> We call the interactions in this region *regular* CS,<sup>S4,S5</sup> when it is necessary to distinguish from *pure* CS. The role of  $\nabla^2\rho_b(\mathbf{r}_c)$  in the classification can be replaced by  $H_b(\mathbf{r}_c) - V_b(\mathbf{r}_c)/2$ , since  $(\hbar^2/8m)\nabla^2\rho_b(\mathbf{r}_c) = H_b(\mathbf{r}_c) - V_b(\mathbf{r}_c)/2$  (Equation (S2)). Scheme S1 summarizes the classification.

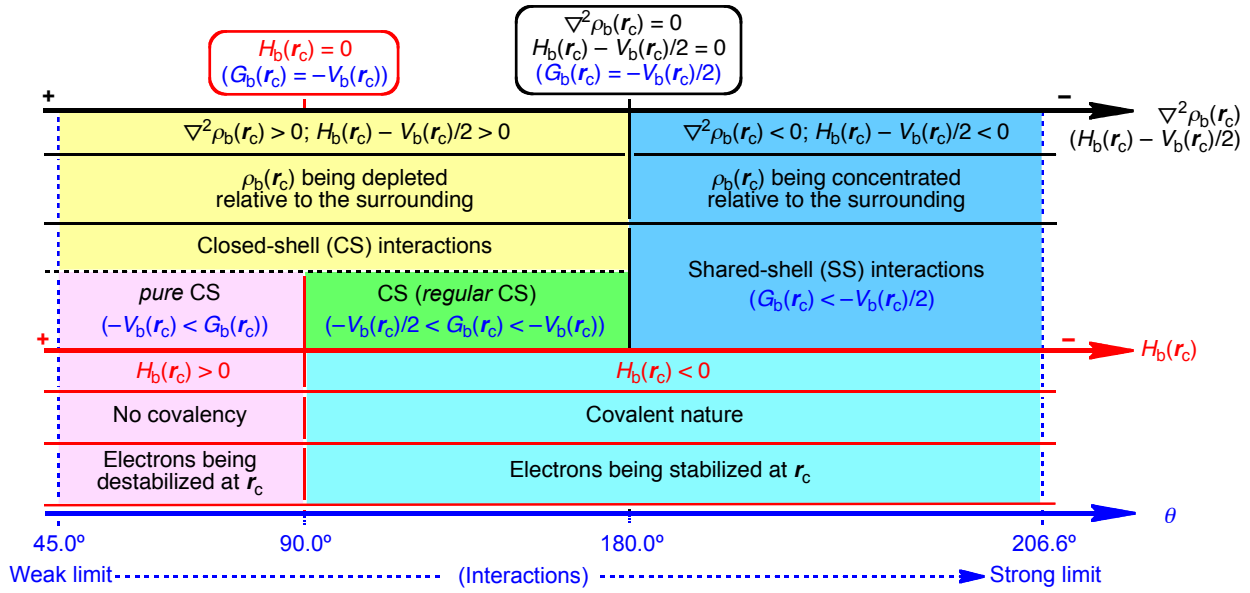

**Scheme S1.** Classification of interactions by the signs of  $\nabla^2\rho_b(r_c)$  and  $H_b(r_c)$ , together with  $G_b(r_c)$  and  $V_b(r_c)$ .

We proposed QTAIM-DFA by plotting  $H_b(r_c)$  versus  $H_b(r_c) - V_b(r_c)/2 (= (\hbar^2/8m)\nabla^2\rho_b(r_c))$ ,<sup>S4a</sup> after the proposal of  $H_b(r_c)$  versus  $\nabla^2\rho_b(r_c)$ .<sup>S4b</sup> Both axes in the plot of the former are given in energy unit, therefore, distances on the  $(x, y) (= (H_b(r_c) - V_b(r_c)/2, H_b(r_c)))$  plane can be expressed in the energy unit, which provides an analytical development. QTAIM-DFA incorporates the classification of interactions by the signs of  $\nabla^2\rho_b(r_c)$  and  $H_b(r_c)$ . Scheme S2 summarizes the QTAIM-DFA treatment. Interactions of *pure* CS appear in the first quadrant, those of *regular* CS in the fourth quadrant and SS interactions do in the third quadrant. No interactions appear in the second one.

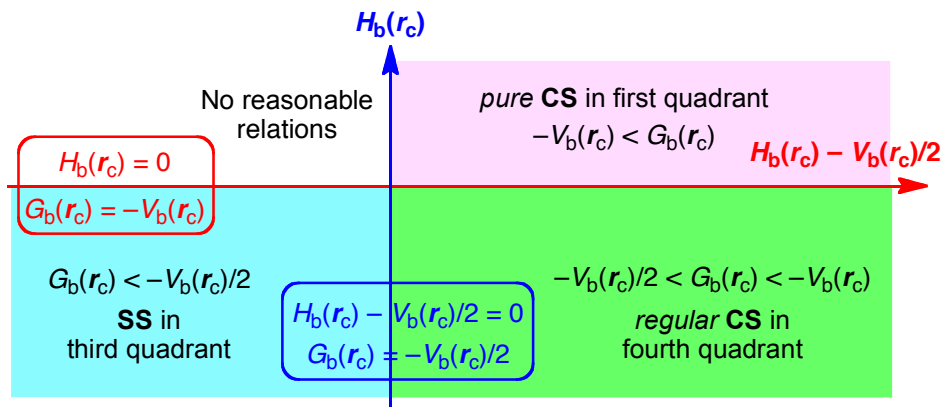

**Scheme S2.** QTAIM-DFA: Plot of  $H_b(r_c)$  versus  $H_b(r_c) - V_b(r_c)/2$  for Weak to Strong Interactions

In our treatment, data for perturbed structures around fully optimized structures are also employed for the plots, together with the fully optimized ones (see Figure S1).<sup>S4-S8</sup> We proposed the concept of the "dynamic nature of interaction" originated from the perturbed structures. The behavior of interactions at the fully optimized structures corresponds to "the static nature of interactions", whereas that containing perturbed structures exhibit the "dynamic nature of interaction" as explained below.

The method to generate the perturbed structures is discussed later. Plots of  $H_b(\mathbf{r}_c)$  versus  $H_b(\mathbf{r}_c) - V_b(\mathbf{r}_c)/2$  are analyzed employing the polar coordinate  $(R, \theta)$  representation with  $(\theta_p, \kappa_p)$  parameters.<sup>S4a,S5-S8</sup> Figure S1 explains the treatment.  $R$  in  $(R, \theta)$  is defined by Equation (S3) and given in the energy unit.  $R$  corresponds to the energy for an interaction at BCP of the  $[(H_b(\mathbf{r}_c))^2 + (H_b(\mathbf{r}_c) - V_b(\mathbf{r}_c)/2)^2]^{1/2}$  form in the plot, where  $R = 0$  for the enough large interaction distance. The plots show a spiral stream, as a whole.  $\theta$  in  $(R, \theta)$  defined by Equation (S4), measured from the  $y$ -axis, controls the spiral stream of the plot. Each plot for an interaction shows a specific curve, which provides important information of the interaction (see Figure S1). The curve is expressed by  $\theta_p$  and  $\kappa_p$ . While  $\theta_p$ , defined by Equation (S5) and measured from the  $y$ -direction, corresponds to the tangent line of a plot, where  $\theta_p$  is calculated employing data of the perturbed structures with a fully-optimized structure and  $\kappa_p$  is the curvature of the plot (Equation (S6)). While  $(R, \theta)$  correspond to the static nature,  $(\theta_p, \kappa_p)$  represent the dynamic nature of interactions. We call  $(R, \theta)$  and  $(\theta_p, \kappa_p)$  QTAIM-DFA parameters, whereas  $\rho_b(\mathbf{r}_c)$ ,  $\nabla^2\rho_b(\mathbf{r}_c)$ ,  $G_b(\mathbf{r}_c)$ ,  $V_b(\mathbf{r}_c)$ ,  $H_b(\mathbf{r}_c)$  and  $H_b(\mathbf{r}_c) - V_b(\mathbf{r}_c)/2$  belong to QTAIM functions.  $k_b(\mathbf{r}_c)$ , defined by Equation (S7), is an QTAIM function but it will be treated as if it were an QTAIM-DFA parameter, if suitable.

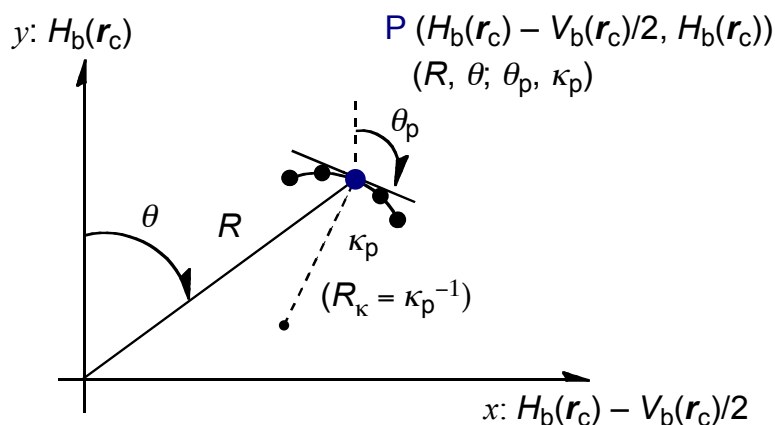

**Figure S1.** Polar  $(R, \theta)$  coordinate representation of  $H_b(\mathbf{r}_c)$  versus  $H_b(\mathbf{r}_c) - V_b(\mathbf{r}_c)/2$ , with  $(\theta_p, \kappa_p)$  parameters.

$$R = (x^2 + y^2)^{1/2} \quad (\text{S3})$$

$$\theta = 90^\circ - \tan^{-1}(y/x) \quad (\text{S4})$$

$$\theta_p = 90^\circ - \tan^{-1}(dy/dx) \quad (\text{S5})$$

$$\kappa_p = |d^2y/dx^2| / [1 + (dy/dx)^2]^{3/2} \quad (\text{S6})$$

$$k_b(\mathbf{r}_c) = V_b(\mathbf{r}_c)/G_b(\mathbf{r}_c) \quad (\text{S7})$$

where  $(x, y) = (H_b(\mathbf{r}_c) - V_b(\mathbf{r}_c)/2, H_b(\mathbf{r}_c))$

## Criteria for classification of interactions: behavior of typical interactions elucidated by QTAIM-DFA

$H_b(r_c)$  are plotted versus  $H_b(r_c) - V_b(r_c)/2$  for typical interactions in vdW (van der Waals interactions), HBs (hydrogen bonds), CT-MCs (molecular complexes through charge transfer),  $X_3^-$  (trihalide ions), CT-TBPs (trigonal bipyramidal adducts through charge-transfer), Cov-w (weak covalent bonds) and Cov-s (strong covalent bonds).<sup>S4-S8</sup> Rough criteria are obtained by applying QTAIM-DFA, after the analysis of the plots for the typical interactions according to Equations (S3)–(S7). Scheme S3 shows the rough criteria, which are accomplished by the  $\theta$  and  $\theta_p$  values, together with the values of  $k_b(r_c)$ . The criteria will be employed to discuss the nature of interactions in question, as a reference.

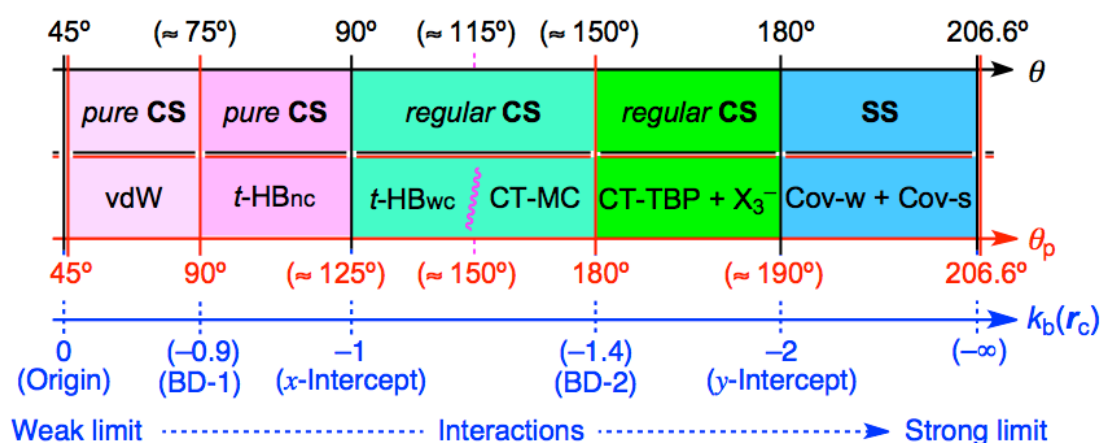

**Scheme S3.** Rough classification and characterization of interactions by  $\theta$  and  $\theta_p$ , together with  $k_b(r_c)$  ( $= V_b(r_c)/G_b(r_c)$ ).

## Characterization of interactions

The characterization of interactions is explained employing  $[^1\text{Cl}^-\text{Cl}^-\text{Cl}^-]$ . The wide range of the perturbed structures were generated by partially optimizing  $r(\text{Cl}^-\text{Cl}^-\text{Cl}^-)$  in  $[^1\text{Cl}^-\text{Cl}^-\text{Cl}^-]$ , assuming the  $C_{\infty v}$  symmetry, with  $r(\text{Cl}^-\text{Cl}^-\text{Cl}^-)$  being fixed in the wide range. The partial optimization method is called POM.<sup>S4b,S5</sup> The QTAIM functions, such as  $V_b(r_c)$ ,  $G_b(r_c)$ ,  $H_b(r_c)$ ,  $H_b(r_c) - V_b(r_c)/2$  are calculated at BCPs for the wide varieties of the perturbed structures of  $[^1\text{Cl}^-\text{Cl}^-\text{Cl}^-]$ .  $H_b(r_c) - V_b(r_c)/2$  and  $H_b(r_c)$  are plotted versus the interaction distances  $r(\text{Cl}^-\text{Cl}^-\text{Cl}^-)$  in the perturbed structures of  $[^1\text{Cl}^-\text{Cl}^-\text{Cl}^-]$ , in the wide range. Figure S2 shows the plots. Each plot is analyzed using a regression curve of the ninth function and the first derivative of each regression curve is obtained. As shown in Figure S2, the maximum value of  $H_b(r_c)$  ( $d(H_b(r_c))/dr = 0$ ) is defined as the borderline between vdW and t-HB interactions. Similarly, the maximum value of  $H_b(r_c) - V_b(r_c)/2$  ( $d(H_b(r_c) - V_b(r_c)/2)/dr = 0$ ) does to the borderline between CT-MC and CT-TBP. However, it seems difficult to find a characteristic point

corresponding to the borderline between *t*-HB and CT-MC in nature. Therefore, the borderline is tentatively given by  $\theta_p = 150^\circ$  based on the expectation from the experimental results, where  $\theta_p$  is defined by  $[90^\circ - \tan^{-1}[dH_b(r_c)/d(H_b(r_c) - V_b(r_c)/2)]]$  in the plot of  $H_b(r_c)$  versus  $H_b(r_c) - V_b(r_c)/2$ . The proposed classification and characterization of interactions, by means of the QTAIM functions of  $H_b(r_c)$ ,  $H_b(r_c) - V_b(r_c)/2$ ,  $G_b(r_c)$ , and/or  $V_b(r_c)$ , are summarized in Table S1.

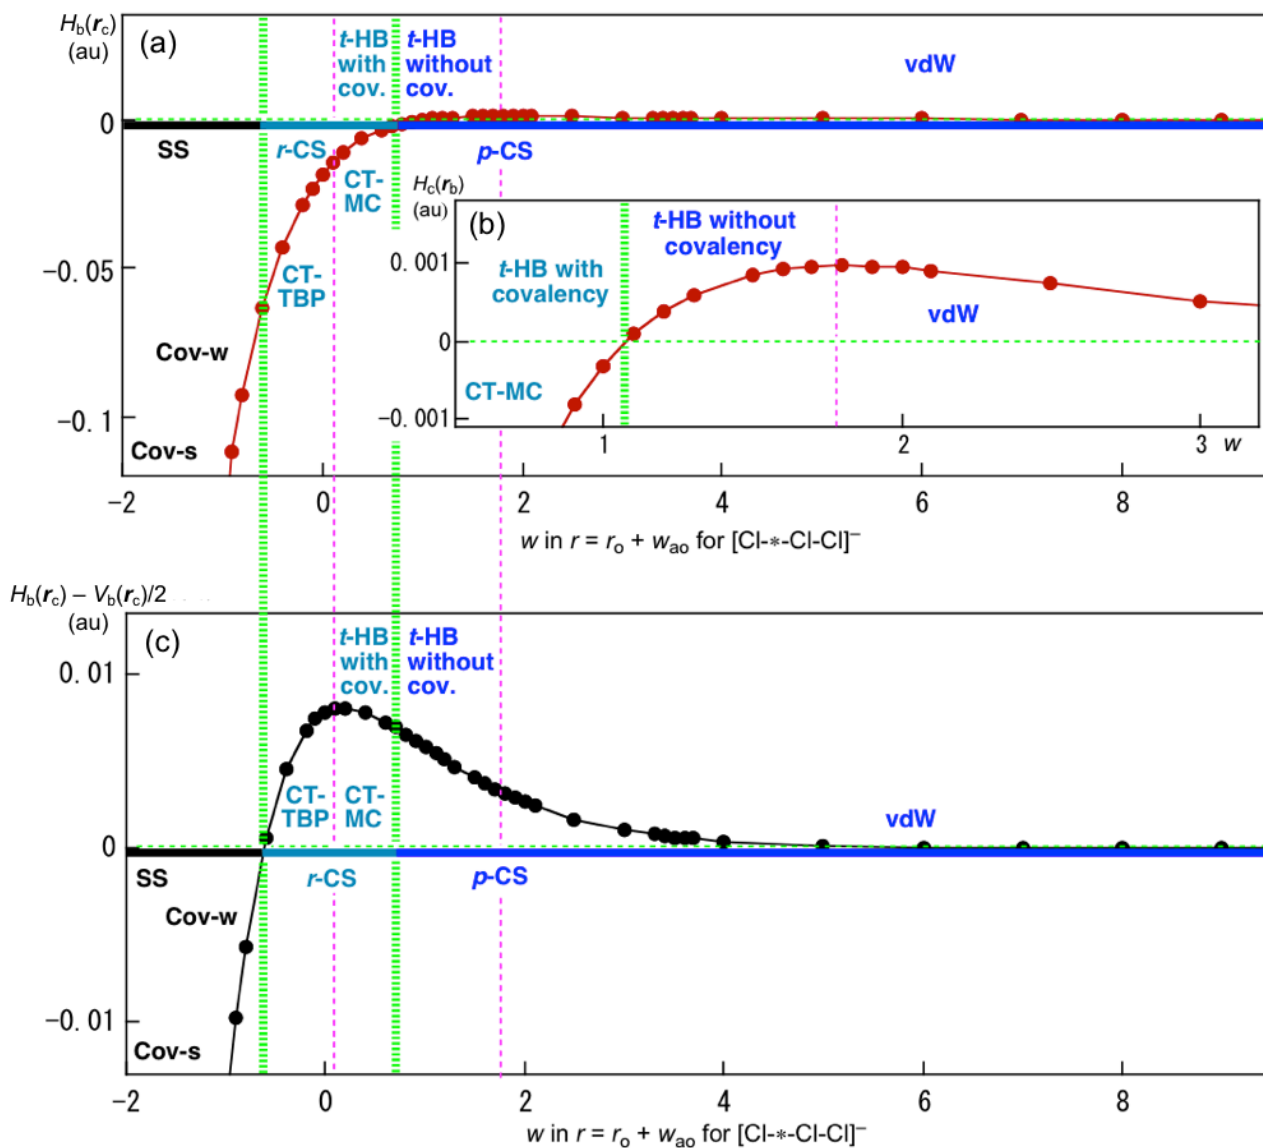

**Figure S2.** Plot of  $H_b(r_c)$  versus  $w$  in  $r(^1Cl-^2Cl) = r_o(^1Cl-^2Cl) + wa_o$  for  $^1Cl-^2Cl-^3Cl^-$  (a) with the magnified picture of (a) (b) and that of  $H_b(r_c) - V_b(r_c)/2$  versus  $w$  (c). Typical hydrogen bonds without covalency and typical hydrogen bonds with covalency are abbreviated as *t*-HB without cov. and *t*-HB with cov., respectively, whereas Cov-w and Cov-s stand for weak covalent bonds and strong covalent bonds, respectively.

**Table S1.** Proposed definitions for the classification and characterization of interactions by the signs  $H_b(\mathbf{r}_c)$  and  $H_b(\mathbf{r}_c) - V_b(\mathbf{r}_c)/2$  and their first derivatives, together with the tentatively proposed definitions by the characteristic points on the plots of  $H_b(\mathbf{r}_c)$  versus  $H_b(\mathbf{r}_c) - V_b(\mathbf{r}_c)/2$ . The tentatively proposed definitions are shown by italic. The requirements for the interactions are also shown.

| ChP/Interaction                           | Requirements by $H_b(\mathbf{r}_c)$ and $V_b(\mathbf{r}_c)$                                                                      | Requirements by $G_b(\mathbf{r}_c)$ and $V_b(\mathbf{r}_c)$                                                                  |
|-------------------------------------------|----------------------------------------------------------------------------------------------------------------------------------|------------------------------------------------------------------------------------------------------------------------------|
| Origin                                    | $H_b(\mathbf{r}_c) - V_b(\mathbf{r}_c)/2 = 0; H_b(\mathbf{r}_c) = 0$                                                             | $G_b(\mathbf{r}_c) = 0; V_b(\mathbf{r}_c) = 0$                                                                               |
| vdW                                       | $H_b(\mathbf{r}_c) > 0; dH_b(\mathbf{r}_c)/d(-r) > 0$                                                                            | $G_b(\mathbf{r}_c) > -V_b(\mathbf{r}_c); dG_b(\mathbf{r}_c)/d(-r) > -dV_b(\mathbf{r}_c)/d(-r)$                               |
| Borderline (BD-1)                         | $H_b(\mathbf{r}_c) > 0; dH_b(\mathbf{r}_c)/d(-r) = 0$                                                                            | $G_b(\mathbf{r}_c) > -V_b(\mathbf{r}_c); dG_b(\mathbf{r}_c)/d(-r) = -dV_b(\mathbf{r}_c)/d(-r)$                               |
| <i>t</i> -HB <sub>with no covalency</sub> | $H_b(\mathbf{r}_c) > 0; dH_b(\mathbf{r}_c)/d(-r) < 0$                                                                            | $G_b(\mathbf{r}_c) > -V_b(\mathbf{r}_c); dG_b(\mathbf{r}_c) < -dV_b(\mathbf{r}_c)$                                           |
| Borderline (x-intercept)                  | $H_b(\mathbf{r}_c) = 0$ ( $\theta_p^a = 125^\circ$ )                                                                             | $G_b(\mathbf{r}_c) = -V_b(\mathbf{r}_c)$ ( $\theta_p^a = 125^\circ$ )                                                        |
| <i>t</i> -HB <sub>with covalency</sub>    | $H_b(\mathbf{r}_c) < 0; (125^\circ < \theta_p^a < 150^\circ$                                                                     | $G_b(\mathbf{r}_c) < -V_b(\mathbf{r}_c); (125^\circ < \theta_p^b < 150^\circ$                                                |
| <i>Borderline (Tentative)</i>             | $\theta_p^a = 150^\circ$                                                                                                         | $\theta_p^b = 150^\circ$                                                                                                     |
| CT-MC                                     | $d(H_b(\mathbf{r}_c) - V_b(\mathbf{r}_c)/2)/d(-r) > 0;$<br>$150^\circ < \theta_p^a < 180^\circ$                                  | $dG_b(\mathbf{r}_c) > dV_b(\mathbf{r}_c)/2;$<br>$150^\circ < \theta_p^a < 180^\circ$                                         |
| Borderline (BD-2)                         | $d(H_b(\mathbf{r}_c) - V_b(\mathbf{r}_c)/2)/d(-r) = 0$<br>$(H_b(\mathbf{r}_c) - V_b(\mathbf{r}_c)/2 > 0; H_b(\mathbf{r}_c) < 0)$ | $2dG_b(\mathbf{r}_c)/d(-r) = -dV_b(\mathbf{r}_c)/d(-r)$<br>$(-V_b(\mathbf{r}_c)/2 < G_b(\mathbf{r}_c) < -V_b(\mathbf{r}_c))$ |
| CT-TBP with $X_3^-$                       | $d(H_b(\mathbf{r}_c) - V_b(\mathbf{r}_c)/2)/d(-r) < 0$<br>$(H_b(\mathbf{r}_c) - V_b(\mathbf{r}_c)/2 > 0; H_b(\mathbf{r}_c) < 0)$ | $2dG_b(\mathbf{r}_c)/d(-r) < -dV_b(\mathbf{r}_c)/d(-r)$<br>$(-V_b(\mathbf{r}_c)/2 < G_b(\mathbf{r}_c) < -V_b(\mathbf{r}_c))$ |
| Borderline (y-intercept)                  | $H_b(\mathbf{r}_c) - V_b(\mathbf{r}_c)/2 = 0$ ( $H_b(\mathbf{r}_c) < 0$ )                                                        | $G_b(\mathbf{r}_c) = -V_b(\mathbf{r}_c)/2$ ( $G_b(\mathbf{r}_c) < -V_b(\mathbf{r}_c)$ )                                      |
| Cov-w                                     | $H_b(\mathbf{r}_c) - V_b(\mathbf{r}_c)/2 < 0; R^c < 0.15$ au                                                                     | $G_b(\mathbf{r}_c) < -V_b(\mathbf{r}_c)/2; R^c < 0.15$ au                                                                    |
| <i>Borderline (Tentative)</i>             | $R^c = 0.15$ au                                                                                                                  | $R^d = 0.15$ au                                                                                                              |
| Cov-s                                     | $H_b(\mathbf{r}_c) - V_b(\mathbf{r}_c)/2 < 0; R^c > 0.15$ au                                                                     | $G_b(\mathbf{r}_c) < -V_b(\mathbf{r}_c)/2; R^d > 0.15$ au                                                                    |

a)  $\theta_p = 90^\circ - \tan^{-1} [dH_b(\mathbf{r}_c)/d(H_b(\mathbf{r}_c) - V_b(\mathbf{r}_c)/2)]$ ,  $\theta_p = 125^\circ$  is tentatively given for  $\theta = 90^\circ$ , where  $\theta$  is defined by  $90^\circ - \tan^{-1}[H_b(\mathbf{r}_c)/(H_b(\mathbf{r}_c) - V_b(\mathbf{r}_c)/2)]$  with  $H_b(\mathbf{r}_c) = 0$ . b)  $\theta_p = 90^\circ - \tan^{-1}[d(G_b(\mathbf{r}_c) + V_b(\mathbf{r}_c))/d(G_b(\mathbf{r}_c) + V_b(\mathbf{r}_c)/2)]$ ,  $\theta_p = 125^\circ$  is tentatively given for  $\theta = 90^\circ$ , where  $\theta$  is defined by  $90^\circ - \tan^{-1}[(G_b(\mathbf{r}_c) + V_b(\mathbf{r}_c))/(G_b(\mathbf{r}_c) + V_b(\mathbf{r}_c)/2)]$  with  $(G_b(\mathbf{r}_c) + V_b(\mathbf{r}_c)) = 0$ . c)  $R = [(H_b(\mathbf{r}_c) - V_b(\mathbf{r}_c)/2)^2 + (H_b(\mathbf{r}_c))^2]^{1/2}$ . d)  $R = [(G_b(\mathbf{r}_c) + V_b(\mathbf{r}_c)/2)^2 + (G_b(\mathbf{r}_c) + V_b(\mathbf{r}_c))^2]^{1/2}$ .

**Table S2.** Nonbonded E---E' distances, angles and torsional angles around E and E', observed in **1–3**.

|                                |                         |                         |                         |                         |                           |                           |                           |                           |
|--------------------------------|-------------------------|-------------------------|-------------------------|-------------------------|---------------------------|---------------------------|---------------------------|---------------------------|
| Compd                          | <b>3a</b>               | <b>3b</b>               | <b>3c</b>               | <b>3d<sup>k</sup></b>   | <b>3e-A<sup>k,l</sup></b> | <b>3e-B<sup>k,l</sup></b> | <b>3f-A<sup>k,l</sup></b> | <b>3f-B<sup>k,l</sup></b> |
| (Z, Z')                        | (O, S)                  | (O, Se)                 | (O, Te)                 | (S, Se)                 | (S, Te)                   | (S, Te)                   | (Se, Te)                  | (Se, Te)                  |
| Temp/K <sup>a</sup>            | 103(2)                  | 103(2)                  | 103(2)                  | 103(2)                  | 103(2)                    | 103(2)                    | 110(2)                    | 110(2)                    |
| r/Å <sup>b</sup>               | 2.692(1)                | 2.723(2)                | 2.748(3)                | 3.030(1)                | 3.108(1)                  | 3.076(1)                  | 3.1920(3)                 | 3.1526(3)                 |
| Δr/Å <sup>c,d</sup>            | −0.63                   | −0.70                   | −0.83                   | −0.67                   | −0.75                     | −0.78                     | −0.77                     | −0.81                     |
| θ <sub>1</sub> /° <sup>e</sup> | 117.4(1)                | 118.2(2)                | 120.5(3)                | 103.2(2)                | 100.8(2)                  | 103.7(2)                  | 98.04(9)                  | 100.49(9)                 |
| θ <sub>2</sub> /° <sup>f</sup> | 103.54(7)               | 101.4(1)                | 95.7(1)                 | 99.6(1)                 | 95.0(2)                   | 95.5(1)                   | 95.22(8)                  | 95.77(8)                  |
| θ <sub>3</sub> /° <sup>g</sup> | 101.06(8)               | 98.6(2)                 | 129.2(2)                | 90.2(1)                 | 101.5(1)                  | 95.4(1)                   | 100.45(6)                 | 95.05(6)                  |
| θ <sub>4</sub> /° <sup>h</sup> | 176.34(6)               | 176.4(1)                | 163.5(1)                | 164.6(1)                | 169.0(1)                  | 169.9(1)                  | 171.08(6)                 | 171.95(6)                 |
| φ <sub>1</sub> /° <sup>i</sup> | −107.4(2)               | −105.9(3)               | −176.8(3)               | 100.0(3)                | −82.8(4)                  | −83.6(4)                  | 82.4(2)                   | −83.7(2)                  |
| φ <sub>2</sub> /° <sup>j</sup> | −176.0(1)               | −174.7(2)               | −177.4(3)               | −152.7(3)               | −161.6(3)                 | −165.3(3)                 | 161.5(2)                  | −165.5(2)                 |
| Structure                      | <b>AB</b>               | <b>AB</b>               | <b>BB</b>               | <b>AB</b>               | <b>AB</b>                 | <b>AB</b>                 | <b>AB</b>                 | <b>AB</b>                 |
| Compd                          | <b>1g-A<sup>m</sup></b> | <b>1g-B<sup>m</sup></b> | <b>1h-A<sup>n</sup></b> | <b>1h-B<sup>n</sup></b> | <b>1i-A<sup>o</sup></b>   | <b>1i-B<sup>o</sup></b>   |                           |                           |
| (Z, Z')                        | (O, O)                  | (O, O)                  | (S, S)                  | (S, S)                  | (Se, Se)                  | (Se, Se)                  |                           |                           |
| Temp/K <sup>a</sup>            | RT                      | RT                      | RT                      | RT                      | 103                       | 103                       |                           |                           |
| r/Å <sup>b</sup>               | 2.543                   | 2.547                   | 2.918                   | 2.936                   | 3.051(4)                  | 3.064(4)                  |                           |                           |
| Δr/Å <sup>c,d</sup>            | −0.50                   | −0.49                   | −0.68                   | −0.66                   | −0.75                     | −0.74                     |                           |                           |
| φ <sub>1</sub> /° <sup>i</sup> | −179.85                 | −179.34                 | −143.2                  | −142.1                  | −154.1(3)                 | 136.8(3)                  |                           |                           |
| φ <sub>2</sub> /° <sup>j</sup> | −179.85                 | −179.34                 | −158.3                  | −153.0                  | −138.8(3)                 | 148.0(3)                  |                           |                           |
| structure                      | <b>BB</b>               | <b>BB</b>               | <b>CC</b>               | <b>CC</b>               | <b>CC</b>                 | <b>CC</b>                 |                           |                           |
| Compd                          | <b>2g-A<sup>o</sup></b> | <b>2g-B<sup>o</sup></b> | <b>2h<sup>o</sup></b>   | <b>2i-A<sup>p</sup></b> | <b>2i-B<sup>p</sup></b>   |                           |                           |                           |
| (Z, Z')                        | (O, O)                  | (O, O)                  | (S, S)                  | (Se, Se)                | (Se, Se)                  |                           |                           |                           |
| Temp/K <sup>a</sup>            | 103                     | 103                     | RT                      | RT                      | RT                        |                           |                           |                           |
| r/Å <sup>b</sup>               | 2.590(3)                | 2.604(3)                | 3.047(2)                | 3.091(1)                | 3.048(1)                  |                           |                           |                           |
| Δr/Å <sup>c,d</sup>            | −0.45                   | −0.44                   | −0.55                   | −0.71                   | −0.75                     |                           |                           |                           |
| φ <sub>1</sub> /° <sup>i</sup> | 174.5(3)                | −174.8(3)               | 171.9(3)                | 122.4(7)                | −133.0(7)                 |                           |                           |                           |
| φ <sub>2</sub> /° <sup>j</sup> | 94.0(4)                 | −93.8(4)                | 69.5(4)                 | 141.8(6)                | −143.2(6)                 |                           |                           |                           |
| structure                      | <b>AB</b>               | <b>AB</b>               | <b>AB</b>               | <b>CC</b>               | <b>CC</b>                 |                           |                           |                           |
| Compd                          | <b>3g<sup>o</sup></b>   | <b>3h<sup>o,q</sup></b> | <b>3h<sup>o,q</sup></b> | <b>3i<sup>o</sup></b>   | <b>3j<sup>r</sup></b>     |                           |                           |                           |
| (Z, Z')                        | (O, O)                  | (S, S)                  | (S, S)                  | (Se, Se)                | (Te, Te)                  |                           |                           |                           |
| Temp/K <sup>a</sup>            | 103 K                   | RT                      | RT                      | 103 K                   | RT                        |                           |                           |                           |
| r/Å <sup>b</sup>               | 2.616(9)                | 3.004                   | 3.021(2)                | 3.135(2)                | 3.287                     |                           |                           |                           |
| Δr/Å <sup>c,d</sup>            | −0.42                   | −0.60                   | −0.58                   | −0.67                   | −0.83                     |                           |                           |                           |
| φ <sub>1</sub> /° <sup>i</sup> | 169.28(13)              | −159.99                 | −152.1(4)               | −154.74(16)             | −124.79                   |                           |                           |                           |
| φ <sub>2</sub> /° <sup>j</sup> | −82.92(19)              | −95.25                  | 101.7(4)                | 109.70(16)              | −132.46                   |                           |                           |                           |
| structure                      | <b>AB</b>               | <b>AB</b>               | <b>AB</b>               | <b>AB</b>               | <b>CC</b>                 |                           |                           |                           |

<sup>a</sup> Temperature for measurements. <sup>b</sup>  $r(\text{E}, \text{E}')$ . <sup>c</sup>  $r(\text{E}, \text{E}') - \Sigma r_{\text{vdW}}(\text{E}/\text{E}')$ . <sup>d</sup> Ref. 16 in the text. <sup>e</sup>  $\angle \text{C}_1\text{EC}_{11}$ . <sup>f</sup>  $\angle \text{C}_9\text{E}'\text{C}_{12}$ . <sup>g</sup>  $\angle \text{E}'\text{EC}_{11}$ . <sup>h</sup>  $\angle \text{EE}'\text{C}_{12}$ . <sup>i</sup>  $\angle \text{C}_{10}\text{C}_1\text{EC}_{11}$ . <sup>j</sup>  $\angle \text{C}_{10}\text{C}_9\text{E}'\text{C}_{12}$ . <sup>k</sup> Reexamined data in this work. <sup>l</sup> Ref. 20 in the text. <sup>m</sup> Ref. 35 in the text. <sup>n</sup> Ref. 36 in the text. <sup>o</sup> Ref. 18 in the text. <sup>p</sup> Refs. 15c and 37 in the text. <sup>q</sup> Ref. 38 in the text. <sup>r</sup> Ref. 39 in the text.



**Table S3.** Torsional angles around E for optimized structures on **4** and **5** with MP2/BSS-A<sup>a</sup>

| Species<br>(E) | $\phi_1^b$<br>(°)   | $\phi_2^c$<br>(°)   | $\Delta E_{ES}^{d,e}$<br>(kJ mol <sup>-1</sup> ) | $\Delta E_{ZP}^{d,e}$<br>(kJ mol <sup>-1</sup> ) | Sym-<br>metry  |
|----------------|---------------------|---------------------|--------------------------------------------------|--------------------------------------------------|----------------|
| <b>4A</b> (O)  | 90.0 <sup>f</sup>   | -178.4              | 9.6                                              | 8.0                                              | C <sub>1</sub> |
| <b>4A</b> (S)  | 77.7                | -177.3              | -0.7                                             | -0.9                                             | C <sub>1</sub> |
| <b>4A</b> (Se) | 76.2                | -177.0              | -3.4                                             | -3.6                                             | C <sub>1</sub> |
| <b>4A</b> (Te) | 71.9                | -176.5              | -3.7                                             | -3.5                                             | C <sub>1</sub> |
| <b>5A</b> (O)  | 73.9                | -176.4              | -1.4                                             | -3.1                                             | C <sub>1</sub> |
| <b>5A</b> (S)  | 65.7                | -179.6              | -5.4                                             | -6.2                                             | C <sub>1</sub> |
| <b>5A</b> (Se) | 63.9                | -178.8              | -5.7                                             | -6.1                                             | C <sub>1</sub> |
| <b>5A</b> (Te) | 60.5                | -177.8              | -4.1                                             | -4.1                                             | C <sub>1</sub> |
| <b>4B</b> (O)  | -179.3              | -178.0              | 0.0                                              | 0.0                                              | C <sub>1</sub> |
| <b>4B</b> (S)  | -179.1              | -178.4              | 0.0                                              | 0.0                                              | C <sub>1</sub> |
| <b>4B</b> (Se) | -178.9              | -178.3              | 0.0                                              | 0.0                                              | C <sub>1</sub> |
| <b>4B</b> (Te) | -180.0 <sup>f</sup> | -180.0 <sup>f</sup> | 0.0                                              | 0.0                                              | C <sub>1</sub> |
| <b>5B</b> (O)  | -157.0              | -179.1              | 0.0                                              | 0.0                                              | C <sub>1</sub> |
| <b>5B</b> (S)  | -170.4              | -177.1              | 0.0                                              | 0.0                                              | C <sub>1</sub> |
| <b>5B</b> (Se) | -167.0              | -177.0              | 0.0                                              | 0.0                                              | C <sub>1</sub> |
| <b>5B</b> (Te) | -177.8              | -178.3              | 0.0                                              | 0.0                                              | C <sub>1</sub> |

<sup>a</sup> See text for BSS-A. <sup>b</sup>  $\phi(C_{10}C_1EC_{Me}$  or  $C_{10}C_1EC_{Ph}$ ). <sup>c</sup>  $\phi(C_5C_{10}C_1E)$ . <sup>d</sup>  $\Delta E_{ES}$  and  $\Delta E_{ZP}$  correspond to those on the energy surface and corrected with the zero-point energies, respectively. <sup>e</sup>  $\Delta E(\mathbf{n}: E) = E(\mathbf{nA}: E) - E(\mathbf{nB}: E)$ ;  $\mathbf{n} = 4$  and  $5$ . <sup>f</sup> Fixed.

**Table S4.** Torsional Angles around E for optimized structures on **1a–1f** and **2'b** with MP2/BSS-A.<sup>a</sup>

| Species<br>(type) | $\phi_1^b$<br>(°) | $\phi_2^c$<br>(°) | $\Delta E_{ES}^{d,e}$<br>(kJ mol <sup>-1</sup> ) | $\Delta E_{ZP}^{d,e}$<br>(kJ mol <sup>-1</sup> ) | Sym-<br>metry  |
|-------------------|-------------------|-------------------|--------------------------------------------------|--------------------------------------------------|----------------|
| <b>1a (AA)</b>    | 83.7              | 65.7              | 3.2                                              | -0.1                                             | C <sub>1</sub> |
| <b>1a (AB)</b>    | -95.5             | -179.5            | 1.0                                              | -1.0                                             | C <sub>1</sub> |
| <b>1a (BB)</b>    | 179.1             | -177.2            | 0.0                                              | 0.0                                              | C <sub>1</sub> |
| <b>1a (BA)</b>    | 174.9             | 70.8              | 7.1                                              | 6.5                                              | C <sub>1</sub> |
| <b>1b (AA)</b>    | 86.1              | 63.36             | 8.1                                              | 5.2                                              | C <sub>1</sub> |
| <b>1b (AB)</b>    | -102.6            | 178.6             | 2.0                                              | 0.4                                              | C <sub>1</sub> |
| <b>1b (BB)</b>    | -175.7            | 173.7             | 0.0                                              | 0.0                                              | C <sub>1</sub> |
| <b>1b (BA)</b>    | 173.8             | 70.5              | 11.1                                             | 10.5                                             | C <sub>1</sub> |
| <b>1c (AA)</b>    | 95.5              | 56.3              | 15.8                                             | 13.5                                             | C <sub>1</sub> |
| <b>1c (AB)</b>    | -90.0             | -171.3            | 5.5                                              | 4.1                                              | C <sub>1</sub> |
| <b>1c (BB)</b>    | 168.4             | -170.5            | 0.0                                              | 0.0                                              | C <sub>1</sub> |
| <b>1c (BA)</b>    | 161.9             | 77.4              | 15.5                                             | 14.8                                             | C <sub>1</sub> |
| <b>1d (AA)</b>    | 60.6              | 55.7              | -9.1                                             | -7.1                                             | C <sub>1</sub> |
| <b>1d (AB)</b>    | -70.4             | -163.1            | -15.3                                            | -11.9                                            | C <sub>1</sub> |
| <b>1d (BB)</b>    | 180.0             | 180.0             | 0.0                                              | 0.0                                              | C <sub>1</sub> |
| <b>1d (BA)</b>    | 163.5             | 63.3              | -8.5                                             | -6.4                                             | C <sub>1</sub> |
| <b>1e (AA)</b>    | 62.7              | 47.3              | -7.9                                             | -5.0                                             | C <sub>1</sub> |
| <b>1e (AB)</b>    | -74.9             | -159.6            | -23.3                                            | -18.8                                            | C <sub>1</sub> |
| <b>1e (BB)</b>    | 180.0             | 180.0             | 0.0                                              | 0.0                                              | C <sub>s</sub> |
| <b>1e (BA)</b>    | 162.2             | 52.8              | -2.6                                             | 0.5                                              | C <sub>1</sub> |
| <b>1f (AA)</b>    | 56.4              | 45.5              | -10.9                                            | -7.5                                             | C <sub>1</sub> |
| <b>1f (AB)</b>    | -69.8             | -154.3            | -26.8                                            | -21.9                                            | C <sub>1</sub> |
| <b>1f (BB)</b>    | 180.0             | 180.0             | 0.0                                              | 0.0                                              | C <sub>s</sub> |
| <b>1f (BA)</b>    | -138.6            | 103.7             | -12.4                                            | -7.1                                             | C <sub>1</sub> |
| <b>2'b (AA)</b>   | 77.5              | 81.9              | -3.2                                             | -4.9                                             | C <sub>1</sub> |
| <b>2'b (AB)</b>   | 81.5              | 175.5             | 0.1                                              | -0.5                                             | C <sub>1</sub> |
| <b>2'b (BB)</b>   | 179.5             | -179.5            | 0.0                                              | 0.0                                              | C <sub>1</sub> |

<sup>a</sup> See text for BSS-A. <sup>b</sup>  $\phi(C_8C_1EC_{Me})$ . <sup>c</sup>  $\phi(C_1C_8E'C_{Me})$ . <sup>d</sup>  $\Delta E_{ES}$  and  $\Delta E_{ZP}$  correspond to those on the energy surface and corrected with the zero-point energies, respectively. <sup>e</sup>  $\Delta E(n: \mathbf{XX}') = E(n: \mathbf{XX}') - E(n: \mathbf{BB})$ :  $n = \mathbf{1a-1f}$  and  $\mathbf{2'b}$ .

**Table S5.** Lengths of bond paths (BPs:  $r_{BP}$ ) and the corresponding straight-line distances ( $R_{SL}$ ) for E-\*E' interactions in **1a–1j** and **2'b** evaluated with MP2/BSS-A, together with the differences between them ( $\Delta r_{BP} = r_{BP} - R_{SL}$ )<sup>a</sup>

| Species (type)  | E-*E'   | $r_{BP}^b$<br>(Å) | $R_{SL}^c$<br>(Å) | $\Delta r_{BP}^d$<br>(Å) |
|-----------------|---------|-------------------|-------------------|--------------------------|
| <b>1a (BB)</b>  | O-*-S   | 2.64153           | 2.62795           | 0.01358                  |
| <b>1a (AA)</b>  | O-*-S   | 2.96195           | 2.95247           | 0.00948                  |
| <b>1a (AB)</b>  | O-*-S   | 2.70495           | 2.69377           | 0.01118                  |
| <b>1a (BA)</b>  | O-*-S   | 2.87566           | 2.86291           | 0.01275                  |
| <b>1b (BB)</b>  | O-*-Se  | 2.66137           | 2.65626           | 0.00511                  |
| <b>1b (AA)</b>  | O-*-Se  | 3.01172           | 3.00651           | 0.00521                  |
| <b>1b (AB)</b>  | O-*-Se  | 2.70840           | 2.70517           | 0.00323                  |
| <b>1b (BA)</b>  | O-*-Se  | 2.92737           | 2.91943           | 0.00794                  |
| <b>1c (BB)</b>  | O-*-Te  | 2.72796           | 2.72410           | 0.00386                  |
| <b>1c (AA)</b>  | O-*-Te  | 3.08634           | 3.08020           | 0.00614                  |
| <b>1c (AB)</b>  | O-*-Te  | 2.80626           | 2.80420           | 0.00206                  |
| <b>1c (BA)</b>  | O-*-Te  | 3.01998           | 3.01051           | 0.00947                  |
| <b>1d (BB)</b>  | S-*-Se  | 2.95603           | 2.93905           | 0.01698                  |
| <b>1d (AA)</b>  | S-*-Se  | 3.27781           | 3.26455           | 0.01326                  |
| <b>1d (AB)</b>  | S-*-Se  | 3.01432           | 3.00654           | 0.00778                  |
| <b>1d (BA)</b>  | S-*-Te  | 3.10272           | 3.08713           | 0.01559                  |
| <b>1e (BB)</b>  | S-*-Te  | 3.07121           | 3.05660           | 0.01461                  |
| <b>1e (AA)</b>  | S-*-Te  | 3.37229           | 3.35937           | 0.01292                  |
| <b>1e (AB)</b>  | S-*-Te  | 3.06535           | 3.06047           | 0.00488                  |
| <b>1e (BA)</b>  | S-*-Te  | 3.26176           | 3.24398           | 0.01778                  |
| <b>1f (BB)</b>  | Se-*-Te | 3.14252           | 3.13246           | 0.01006                  |
| <b>1f (AA)</b>  | Se-*-Te | 3.45650           | 3.44676           | 0.00974                  |
| <b>1f (AB)</b>  | Se-*-Te | 3.15972           | 3.15555           | 0.00417                  |
| <b>1f (BA)</b>  | Se-*-Te | 3.27665           | 3.26623           | 0.01042                  |
| <b>1g (BB)</b>  | O-*-O   | 2.53244           | 2.52350           | 0.00894                  |
| <b>1g (AA)</b>  | O-*-O   | 2.74698           | 2.74484           | 0.00214                  |
| <b>1g (AB)</b>  | O-*-O   | 2.64343           | 2.63823           | 0.00520                  |
| <b>1h (BB)</b>  | S-*-S   | 2.91108           | 2.88580           | 0.02528                  |
| <b>1h (AA)</b>  | S-*-S   | 3.21554           | 3.19939           | 0.01615                  |
| <b>1h (AB)</b>  | S-*-S   | 3.00800           | 2.98954           | 0.01846                  |
| <b>1h (CC)</b>  | S-*-S   | 2.94729           | 2.91663           | 0.03066                  |
| <b>1i (BB)</b>  | Se-*-Se | 3.00925           | 2.99860           | 0.01065                  |
| <b>1i (AA)</b>  | Se-*-Se | 3.34888           | 3.33968           | 0.00920                  |
| <b>1i (AB)</b>  | Se-*-Se | 3.10504           | 3.09855           | 0.00649                  |
| <b>1i (CC)</b>  | Se-*-Se | 3.05914           | 3.04497           | 0.01417                  |
| <b>1j (BB)</b>  | Te-*-Te | 3.29066           | 3.28086           | 0.00980                  |
| <b>1j (AA)</b>  | Te-*-Te | 3.59016           | 3.57772           | 0.01244                  |
| <b>1j (AB)</b>  | Te-*-Te | 3.34154           | 3.33604           | 0.00550                  |
| <b>1j (CC)</b>  | Te-*-Te | 3.31352           | 3.30057           | 0.01295                  |
| <b>2'b (BB)</b> | O-*-Se  | 2.65331           | 2.64871           | 0.00460                  |
| <b>2'b (AA)</b> | O-*-Se  | 3.01423           | 3.00819           | 0.00604                  |
| <b>2'b (AB)</b> | O-*-Se  | 2.72082           | 2.71760           | 0.00322                  |

<sup>a</sup> With the MP2/6-311++G(3df,3pd) for MP2/BSS-A method of the Gaussian 09 program. <sup>b</sup> The length of BPs. <sup>c</sup> Straight-line distances. <sup>d</sup>  $\Delta r_{BP} = r_{BP} - R_{SL}$ .

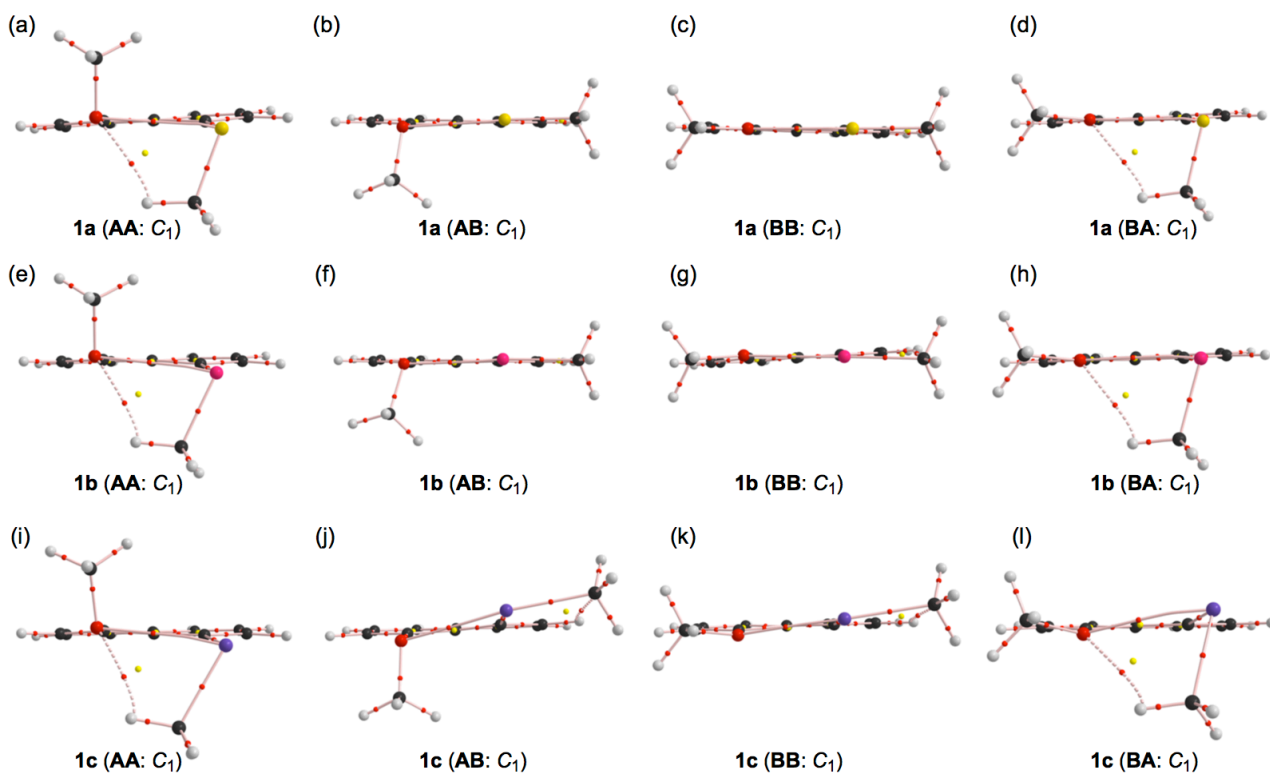

**Figure S3.** Molecular graphs, drawn on the optimized structures, for the conformers in **1a (AA)–1c (BA)**, calculated with MP2/BSS-A.

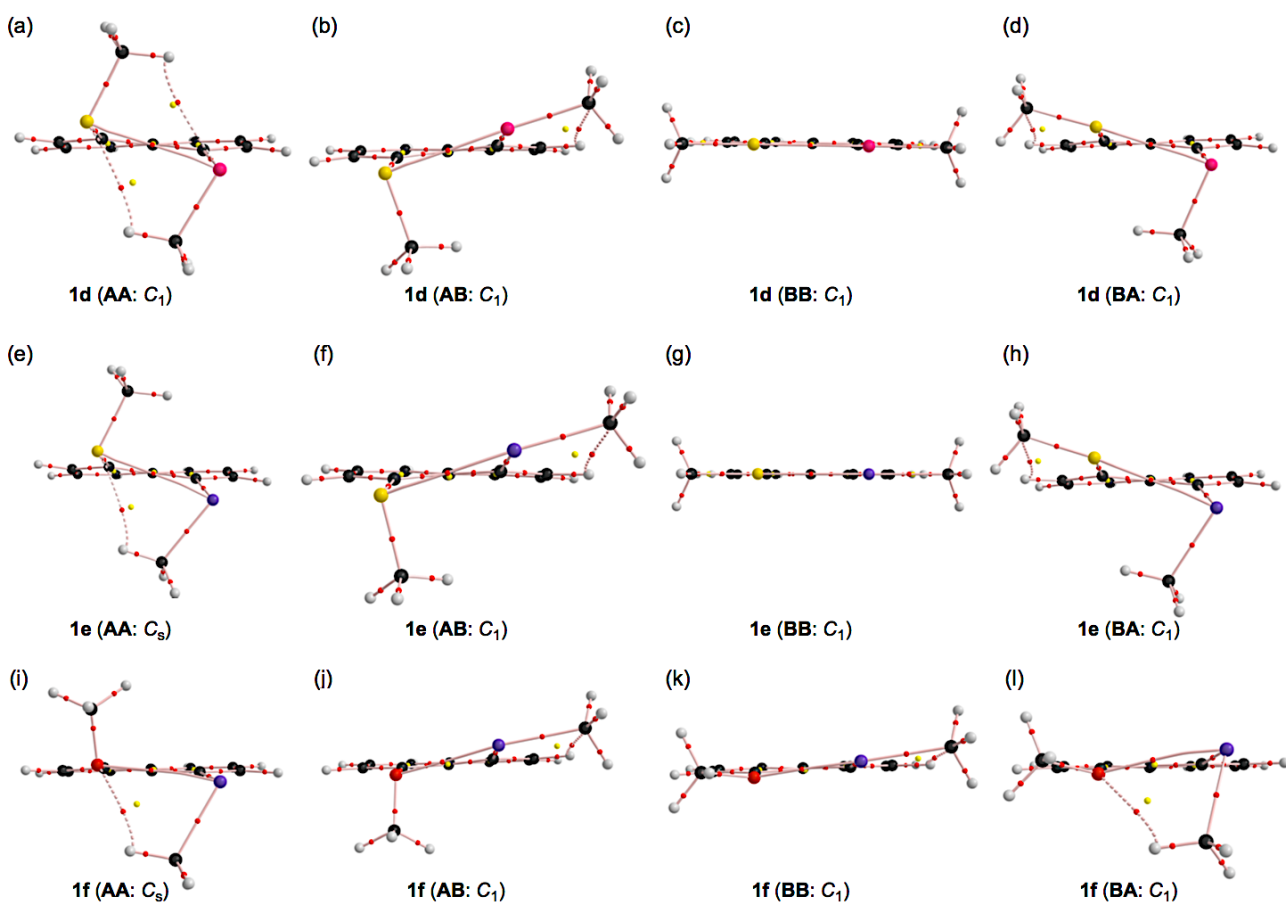

**Figure S4.** Molecular graphs, drawn on the optimized structures, for the conformers in **1d (AA)–1f (BA)**, calculated with MP2/BSS-A.

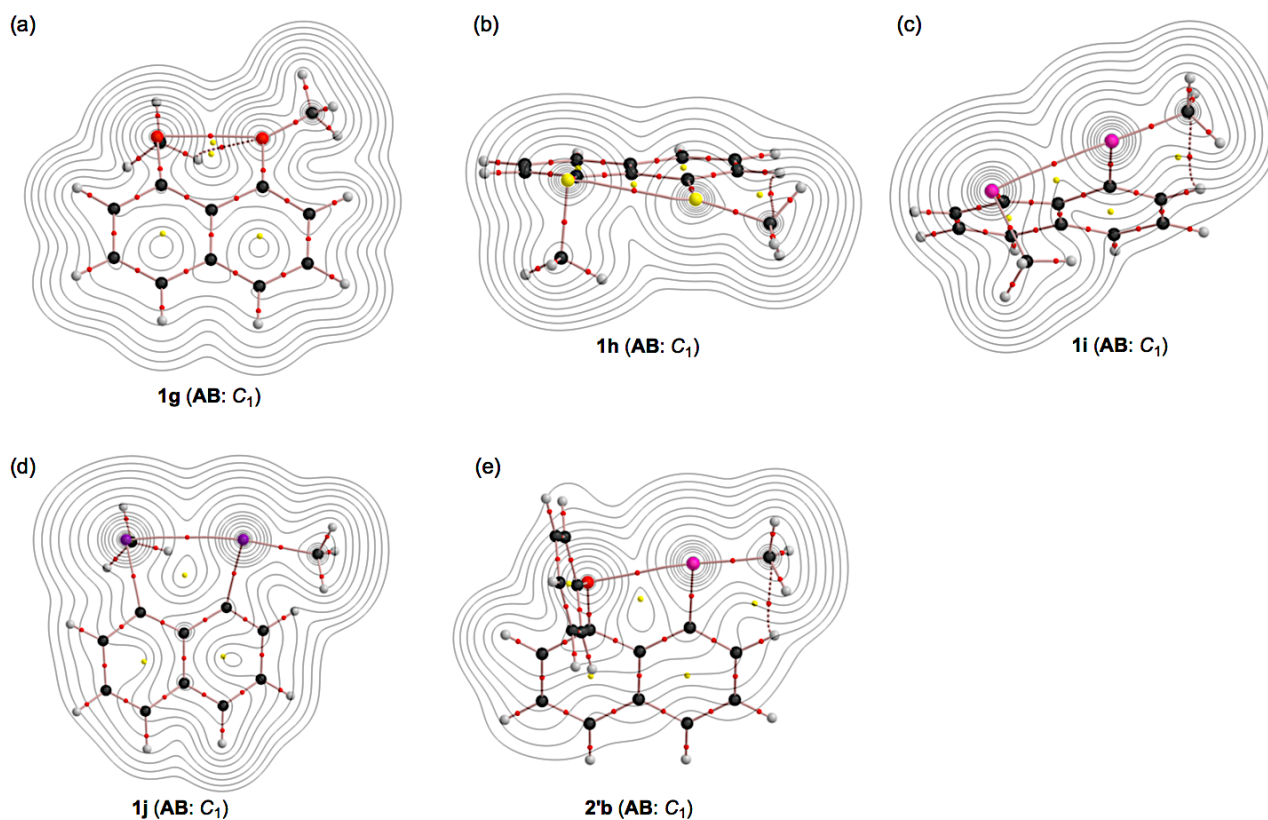

**Figure S5.** Molecular graphs, drawn on the optimized structures, for the conformers in **1g (AB)**–**1j (AB)** and **2'b (AB)**, calculated with MP2/BSS-A.

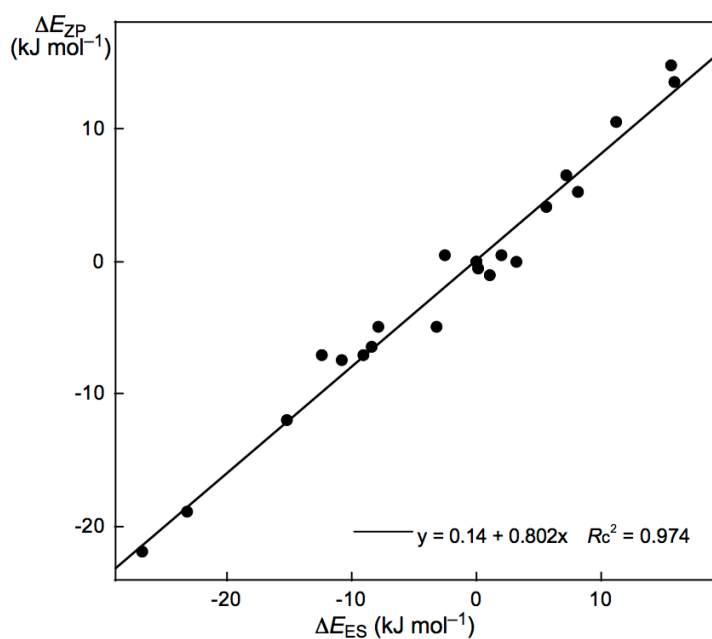

**Figure S5.** Plot of  $\Delta E_{ZP}$  versus  $\Delta E_{ES}$  for **1a–1j** and **2'b**, evaluated with MP2/BSS-A. Data are collected in Table S4 of the Supporting Information.

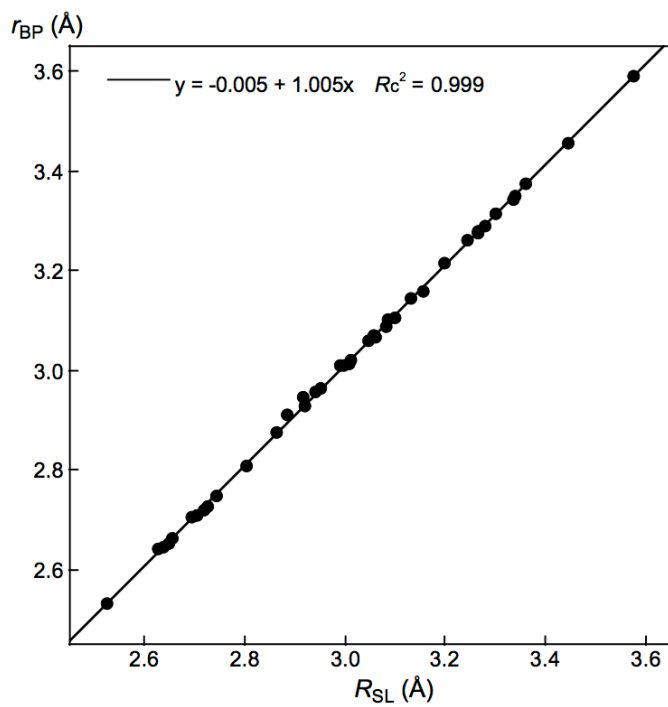

**Figure S6.** Plot of  $r_{BP}$  versus  $R_{SL}$  for **1a–1j** and **2'b** evaluated with MP2/BSS-A. Data are collected in Table S5 of the Supporting Information.

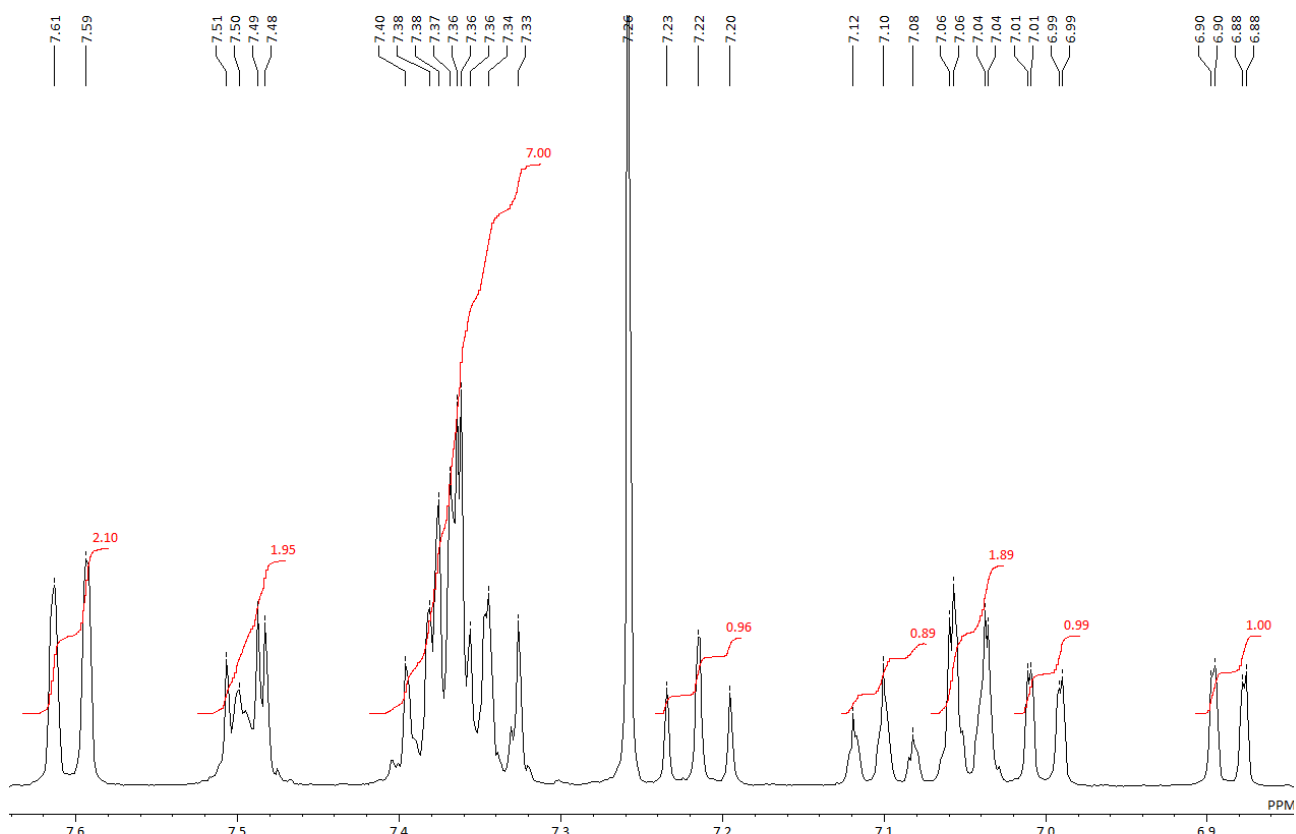

Figure S7. <sup>1</sup>H NMR spectrum of 3a (O, S).

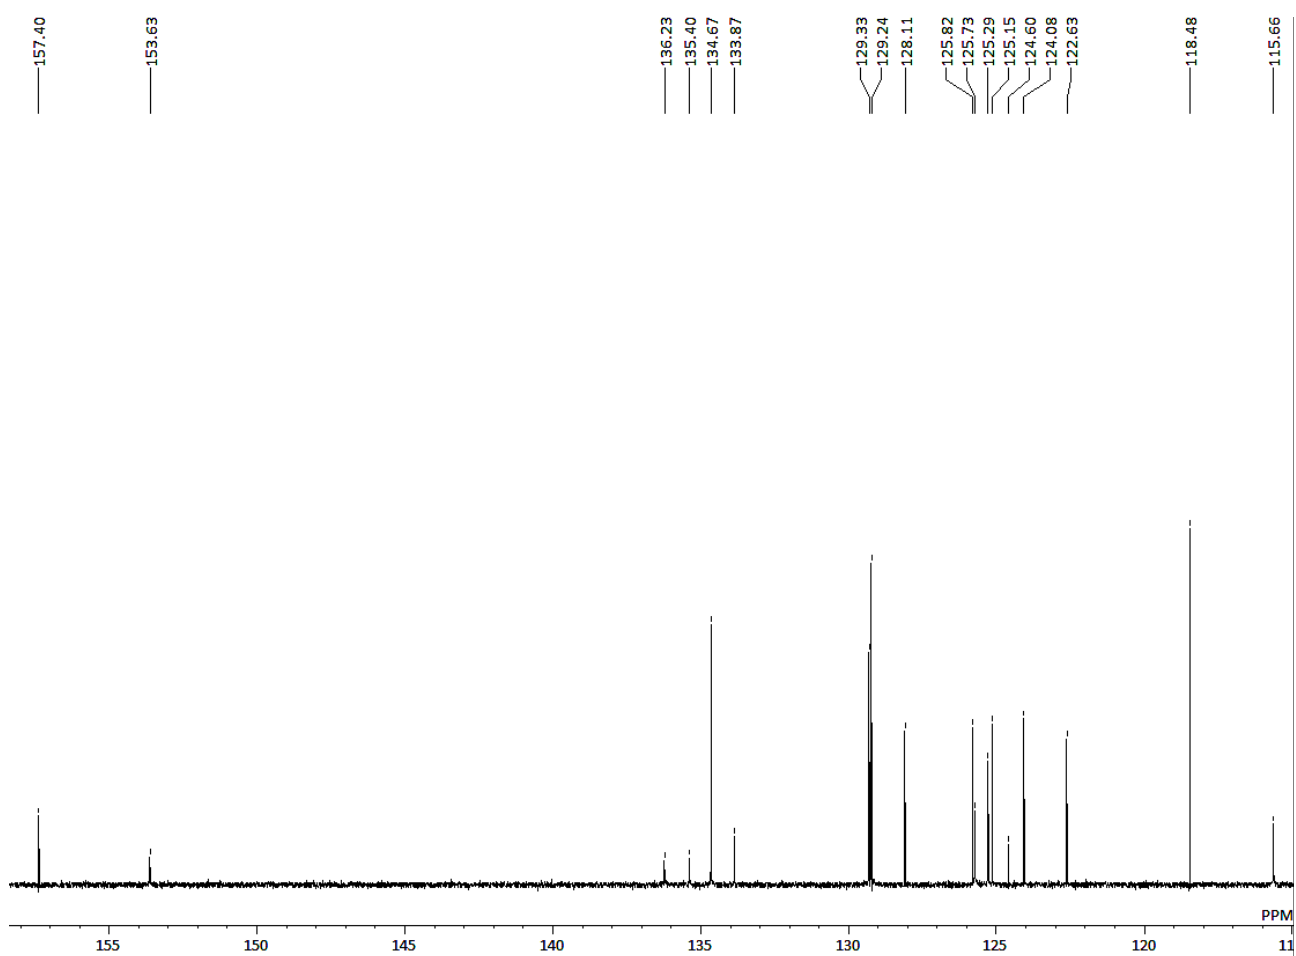

Figure S8. <sup>13</sup>C NMR spectrum of 3a (O, S).

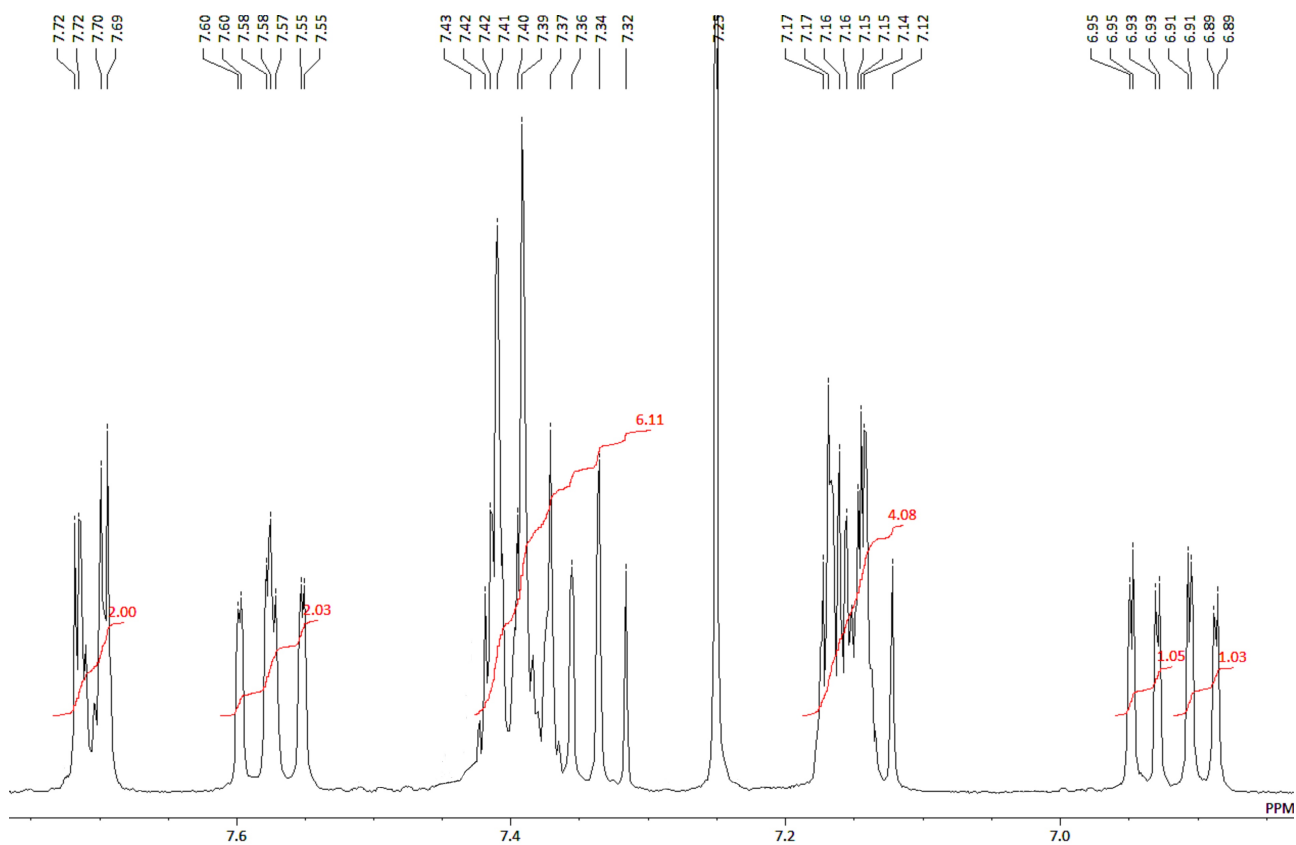

Figure S9. <sup>1</sup>H NMR spectrum of 3b (O, Se).

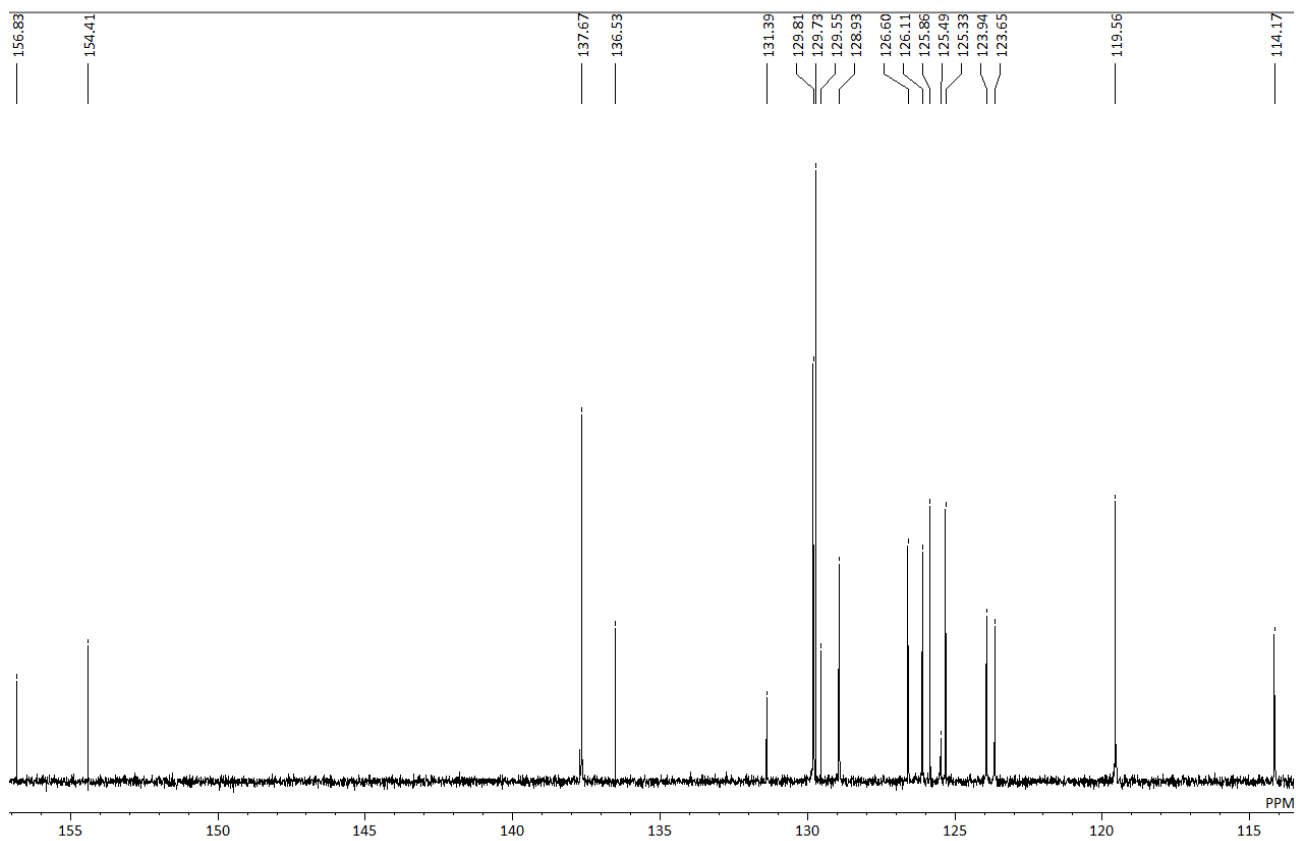

Figure S10. <sup>13</sup>C NMR spectrum of 3b (O, Se).



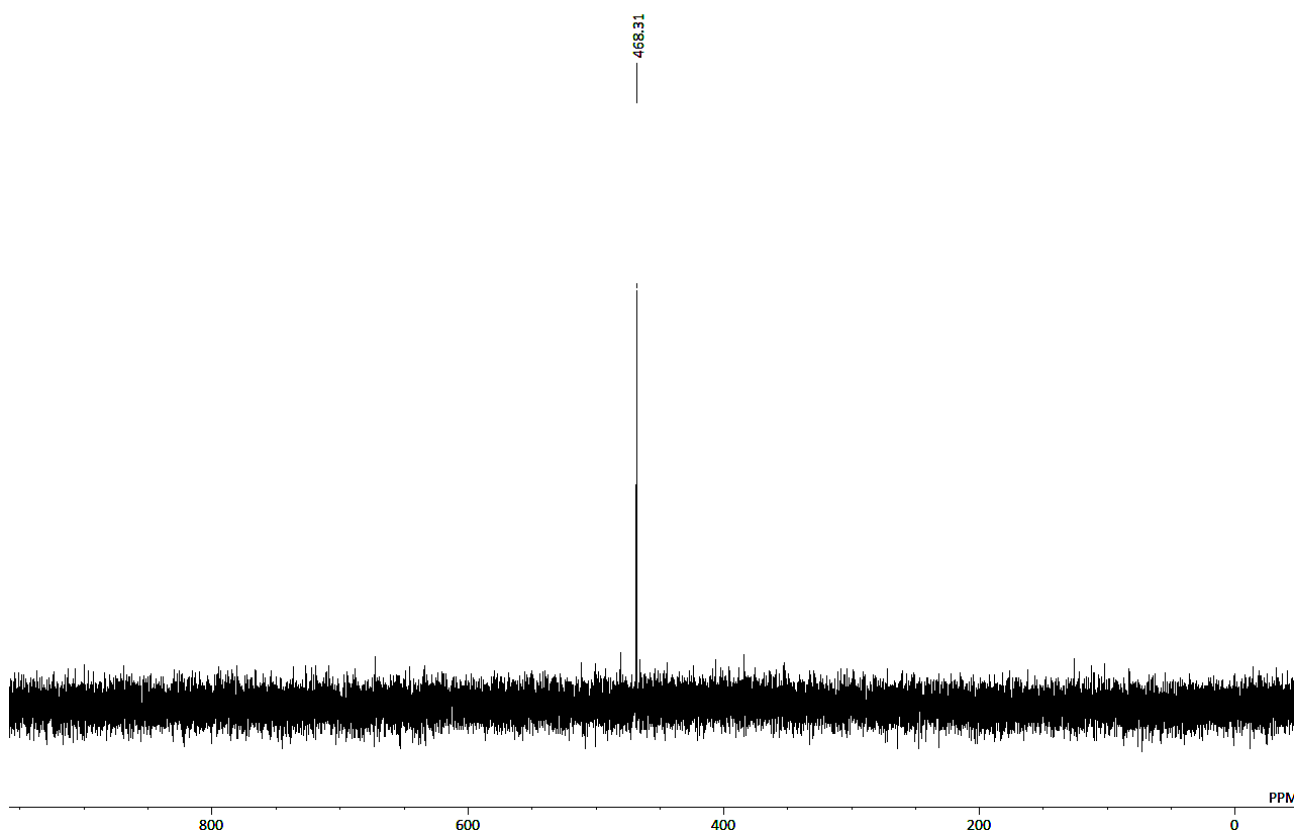

Figure S11.  $^{77}\text{Se}$  NMR spectrum of **3b** (O, Se).

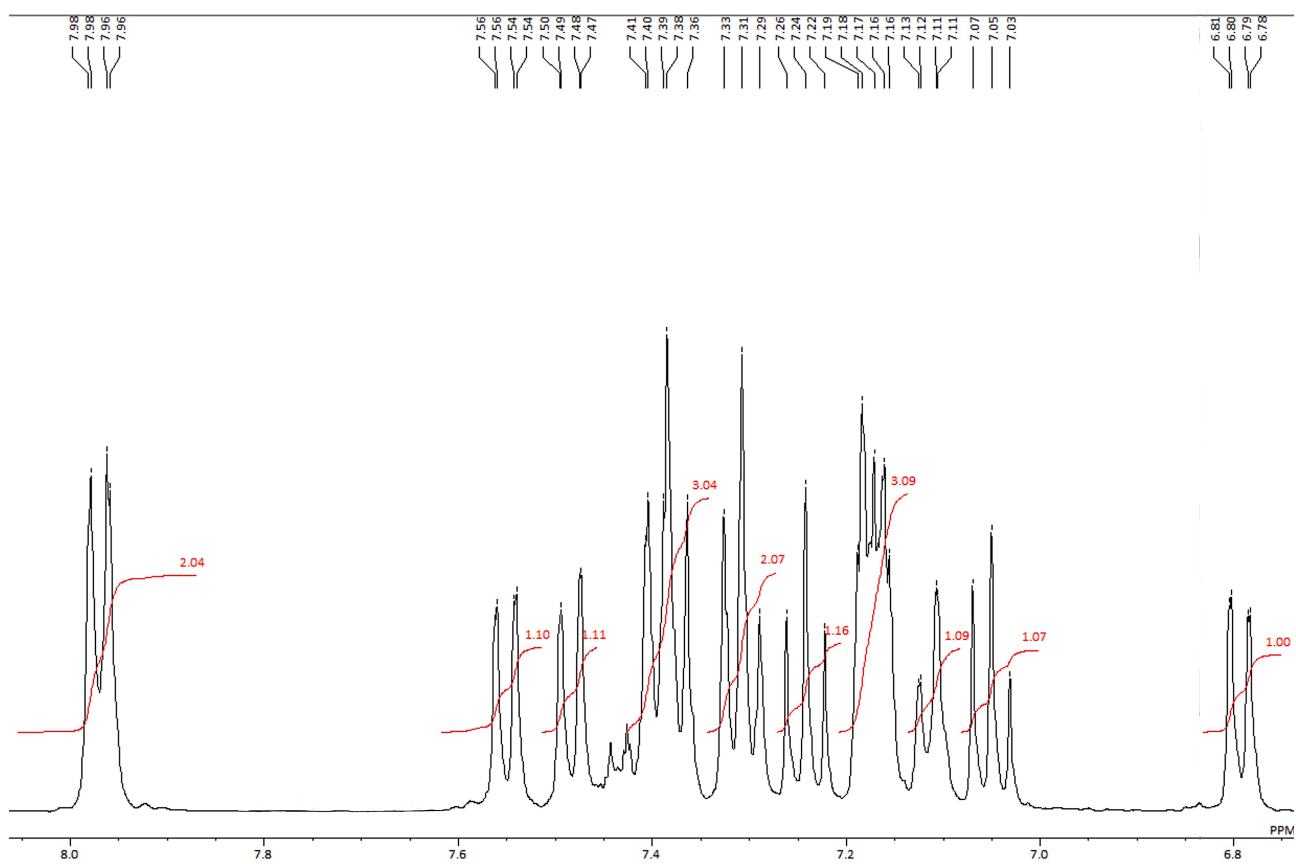

Figure S12.  $^1\text{H}$  NMR spectrum of **3c** (O, Te).

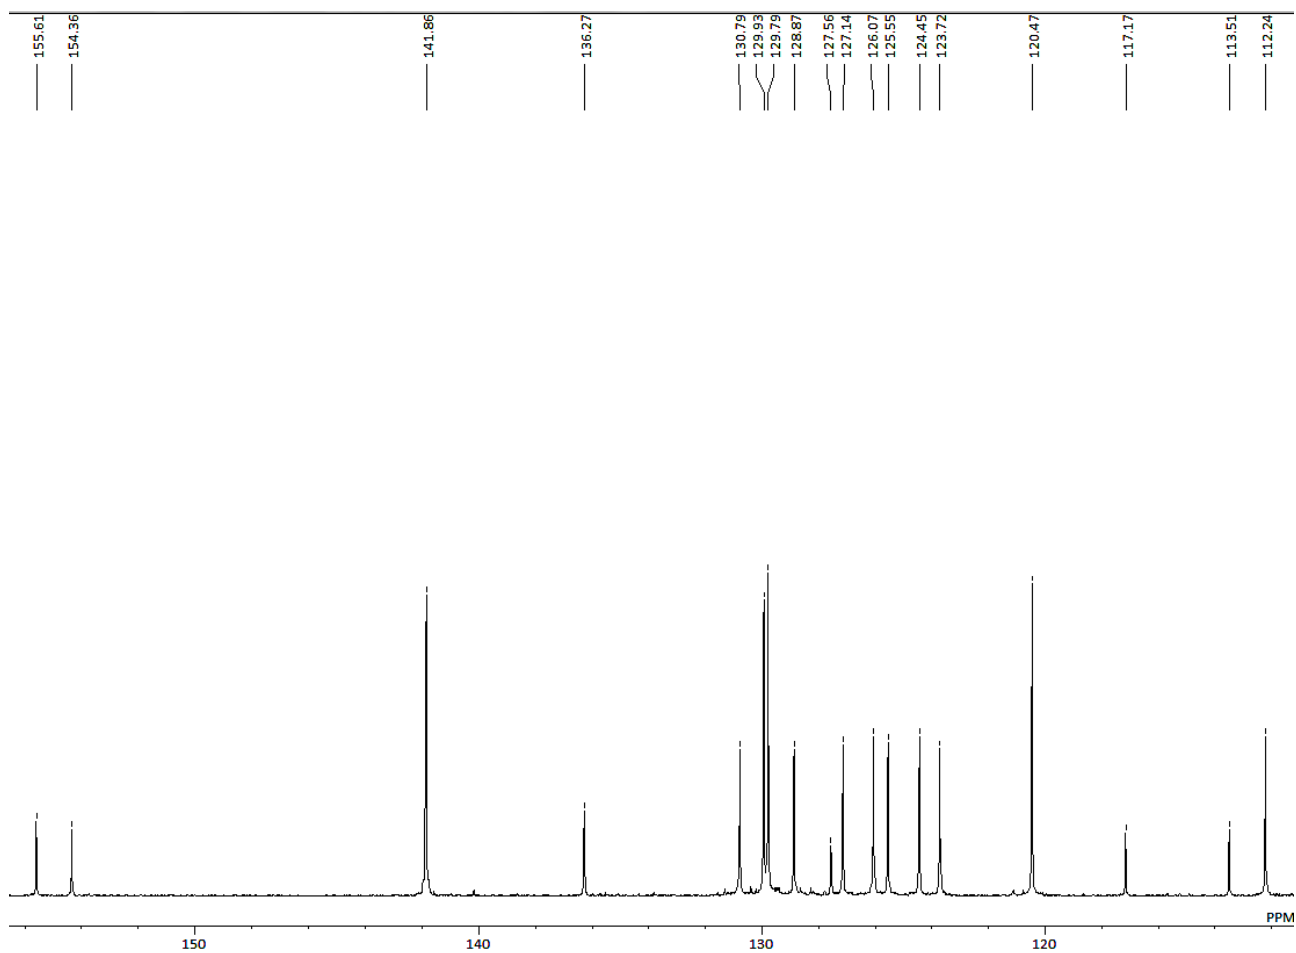

Figure S13. <sup>13</sup>C NMR spectrum of 3c (O, Te).

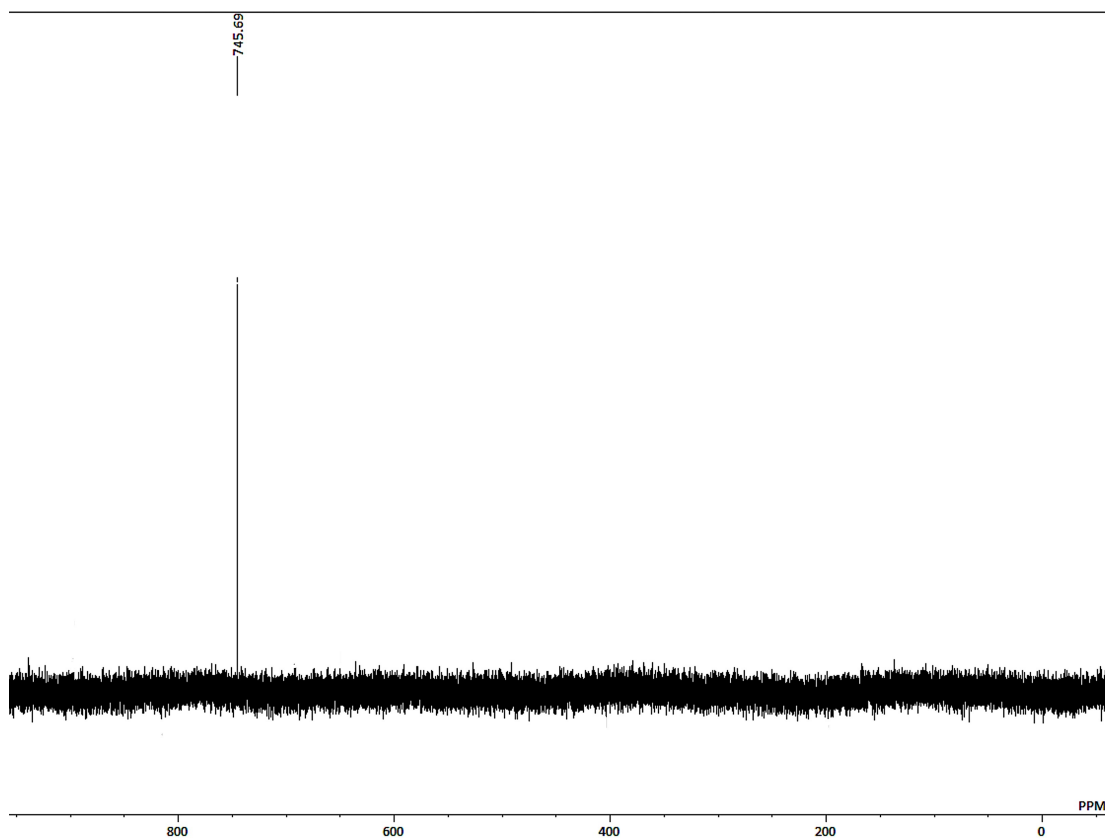

Figure S14. <sup>125</sup>Te NMR spectrum of 3c (O, Te).

## References

- S1 (a) *Atoms in Molecules. A Quantum Theory*: eds. R. F. W. Bader, Oxford University Press, Oxford, UK, 1990; (b) C. F. Matta, R. J. Boyd, *An Introduction to the Quantum Theory of Atoms in Molecules in The Quantum Theory of Atoms in Molecules: From Solid State to DNA and Drug Design*: eds. C. F. Matta, R. J. Boyd, WILEY-VCH, Weinheim, Germany, 2007, Chapter 1.
- S2 (a) R. F. W. Bader, T. S. Slee, D. Cremer, E. Kraka, *J. Am. Chem. Soc.* **1983**, *105*, 5061–5068; (b) R. F. W. Bader, *Chem. Rev.* **1991**, *91*, 893–926; (c) R. F. W. Bader, *J. Phys. Chem. A* **1998**, *102*, 7314–7323; (d) F. Biegler-König, R. F. W. Bader, T. H. Tang, *J. Comput. Chem.* **1982**, *3*, 317–328; (e) R. F. W. Bader, *Acc. Chem. Res.* **1985**, *18*, 9–15; (f) T. H. Tang, R. F. W. Bader, P. MacDougall, *Inorg. Chem.* **1985**, *24*, 2047–2053; (g) F. Biegler-König, J. Schönbohm, D. Bayles, *J. Comput. Chem.* **2001**, *22*, 545–559; (h) F. Biegler-König, J. Schönbohm, *J. Comput. Chem.* **2002**, *23*, 1489–1494.
- S3 W. Nakanishi, T. Nakamoto, S. Hayashi, T. Sasamori, N. Tokitoh, *Chem. Eur. J.* **2007**, *13*, 255–268.
- S4 (a) W. Nakanishi, S. Hayashi, K. Narahara, *J. Phys. Chem. A* **2009**, *113*, 10050–10057; (b) W. Nakanishi, S. Hayashi, K. Narahara, *J. Phys. Chem. A* **2008**, *112*, 13593–13599.
- S5 W. Nakanishi, S. Hayashi, *Curr. Org. Chem.* **2010**, *14*, 181–197.
- S6 (a) W. Nakanishi, S. Hayashi, *J. Phys. Chem. A* **2010**, *114*, 7423–7430; (b) W. Nakanishi, S. Hayashi, K. Matsuiwa, M. Kitamoto, *Bull. Chem. Soc. Jpn* **2012**, *85*, 1293–1305.
- S7 W. Nakanishi, S. Hayashi, *J. Phys. Chem. A* **2013**, *117*, 1795–1803.
- S8 W. Nakanishi, S. Hayashi, *Int. J. Quantum Chem.* **2018**, *118*, e25590.

### Optimized structures given by Cartesian coordinates

Calculations were performed employing the Gaussian 09 program package. The basis sets of the (6211/311/21/2+1s1p), (63211/6111/31/2 + 1s1p1d1f), (743211/74111/721/2 + 1s1p1d1f), and (7433111/743111/7411/2 + 1s1p1d1f) types were employed for O, S, Se, and Te, respectively, implemented from Sapporo Basis Set Factory, with the 6-311G(d) basis set for C and H. The basis set system is called BSS-A, here. The Møller-Plesset second order energy correlation (MP2) level was applied to the calculations for **1a–1j** and **2'b**.

| Adduct               |   | <b>1a (BB)</b>        |          |          |
|----------------------|---|-----------------------|----------|----------|
| Symmetry             |   | $C_1$                 |          |          |
| energy               |   | MP2 = -935.8832345 au |          |          |
| Standard orientation |   |                       |          |          |
| 6                    | 0 | 0.38519               | -0.31967 | 0.01800  |
| 6                    | 0 | 1.14629               | -1.54296 | -0.01934 |
| 6                    | 0 | 1.13141               | 0.90596  | -0.00996 |
| 6                    | 0 | 2.56685               | -1.50437 | 0.02690  |
| 6                    | 0 | -1.05551              | -0.40109 | -0.01213 |
| 6                    | 0 | 0.47909               | -2.79490 | -0.00773 |
| 6                    | 0 | 2.51868               | 0.91260  | 0.03556  |
| 6                    | 0 | 3.23852               | -0.30270 | 0.02415  |
| 6                    | 0 | -1.65603              | -1.66106 | -0.02096 |
| 6                    | 0 | -0.89711              | -2.84951 | -0.03388 |
| 1                    | 0 | 3.06491               | 1.84904  | 0.02283  |
| 1                    | 0 | 4.32513               | -0.27850 | 0.05704  |
| 1                    | 0 | 3.11459               | -2.44425 | 0.01255  |
| 1                    | 0 | -2.73510              | -1.75229 | -0.03900 |
| 1                    | 0 | -1.41216              | -3.80757 | -0.03438 |
| 1                    | 0 | 1.07268               | -3.70681 | -0.01927 |
| 8                    | 0 | 0.38404               | 2.04447  | -0.02608 |
| 6                    | 0 | 1.05278               | 3.29775  | -0.03414 |
| 1                    | 0 | 0.26177               | 4.04582  | -0.05426 |
| 1                    | 0 | 1.65965               | 3.42436  | 0.86832  |
| 1                    | 0 | 1.68320               | 3.40124  | -0.92335 |
| 16                   | 0 | -2.05566              | 1.06830  | 0.00678  |
| 6                    | 0 | -3.73434              | 0.40707  | 0.04278  |
| 1                    | 0 | -4.37350              | 1.29381  | 0.07266  |
| 1                    | 0 | -3.97491              | -0.16539 | -0.85663 |
| 1                    | 0 | -3.92285              | -0.19073 | 0.93814  |

| Adduct               |   | <b>1a (AA)</b>        |          |          |
|----------------------|---|-----------------------|----------|----------|
| Symmetry             |   | $C_1$                 |          |          |
| energy               |   | MP2 = -935.8820155 au |          |          |
| Standard orientation |   |                       |          |          |
| 6                    | 0 | 0.43271               | 0.08046  | -0.03964 |
| 6                    | 0 | 1.78125               | 0.59616  | 0.05340  |
| 6                    | 0 | 0.28086               | -1.33894 | 0.08553  |
| 6                    | 0 | 2.87417               | -0.28297 | 0.27893  |
| 6                    | 0 | -0.63791              | 1.03305  | -0.17131 |
| 6                    | 0 | 2.02705               | 1.97832  | -0.16292 |
| 6                    | 0 | 1.36730               | -2.16334 | 0.33565  |
| 6                    | 0 | 2.66871               | -1.63528 | 0.46249  |
| 6                    | 0 | -0.34216              | 2.38132  | -0.36767 |
| 6                    | 0 | 0.98611               | 2.85706  | -0.38146 |
| 1                    | 0 | 1.17909               | -3.22969 | 0.43623  |
| 1                    | 0 | 3.50715               | -2.30017 | 0.65419  |
| 1                    | 0 | 3.87568               | 0.13760  | 0.34500  |

|    |   |          |          |          |
|----|---|----------|----------|----------|
| 1  | 0 | -1.17212 | 3.07724  | -0.46482 |
| 1  | 0 | 1.18003  | 3.91441  | -0.54478 |
| 1  | 0 | 3.05348  | 2.33821  | -0.11910 |
| 8  | 0 | -0.94670 | -1.94745 | -0.06003 |
| 6  | 0 | -1.27498 | -2.19710 | -1.43224 |
| 1  | 0 | -2.27726 | -2.62457 | -1.43502 |
| 1  | 0 | -1.27367 | -1.26659 | -2.00736 |
| 1  | 0 | -0.55963 | -2.90559 | -1.86479 |
| 16 | 0 | -2.36999 | 0.63869  | -0.11662 |
| 6  | 0 | -2.53588 | 0.07715  | 1.59832  |
| 1  | 0 | -3.60459 | -0.08691 | 1.76265  |
| 1  | 0 | -1.99776 | -0.85937 | 1.74683  |
| 1  | 0 | -2.18023 | 0.85050  | 2.28265  |

Adduct **1a (AB)**  
Symmetry  $C_1$   
energy MP2 = -935.8828581 au  
Standard orientation

|    |   |          |          |          |
|----|---|----------|----------|----------|
| 6  | 0 | 0.47897  | 0.19086  | -0.05519 |
| 6  | 0 | 1.45943  | 1.24789  | 0.01413  |
| 6  | 0 | 0.97635  | -1.13659 | -0.22999 |
| 6  | 0 | 2.84426  | 0.93752  | -0.04520 |
| 6  | 0 | -0.91918 | 0.54300  | -0.03407 |
| 6  | 0 | 1.04075  | 2.58810  | 0.22318  |
| 6  | 0 | 2.33324  | -1.40359 | -0.31434 |
| 6  | 0 | 3.27713  | -0.35831 | -0.24454 |
| 6  | 0 | -1.27386 | 1.87628  | 0.16774  |
| 6  | 0 | -0.30145 | 2.89327  | 0.28693  |
| 1  | 0 | 3.56172  | 1.75342  | 0.01793  |
| 1  | 0 | 2.64440  | -2.43399 | -0.46957 |
| 1  | 0 | 4.33918  | -0.58123 | -0.30978 |
| 1  | 0 | 1.79309  | 3.37141  | 0.29074  |
| 1  | 0 | -2.31721 | 2.16657  | 0.20362  |
| 1  | 0 | -0.62582 | 3.91920  | 0.44605  |
| 8  | 0 | 0.09460  | -2.19455 | -0.30256 |
| 6  | 0 | -0.09126 | -2.84298 | 0.96235  |
| 1  | 0 | -0.84241 | -3.61635 | 0.80313  |
| 1  | 0 | 0.84799  | -3.29331 | 1.30071  |
| 1  | 0 | -0.45075 | -2.12815 | 1.70978  |
| 16 | 0 | -2.15224 | -0.70883 | -0.27500 |
| 6  | 0 | -3.69085 | 0.22895  | -0.17710 |
| 1  | 0 | -4.47533 | -0.51698 | -0.33089 |
| 1  | 0 | -3.83442 | 0.69053  | 0.80315  |
| 1  | 0 | -3.76247 | 0.98011  | -0.96774 |

Adduct **1a (BA)**  
Symmetry  $C_1$   
energy MP2 = -935.8805502 au  
Standard orientation

|   |   |         |          |          |
|---|---|---------|----------|----------|
| 6 | 0 | -0.4607 | -0.06955 | -0.05958 |
| 6 | 0 | -1.8840 | -0.29668 | 0.04726  |
| 6 | 0 | -0.0300 | 1.30373  | -0.09151 |
| 6 | 0 | -2.7788 | 0.78951  | 0.24705  |
| 6 | 0 | 0.3881  | -1.22207 | -0.22183 |
| 6 | 0 | -2.4003 | -1.61895 | 0.02170  |
| 6 | 0 | -0.9324 | 2.34192  | 0.10950  |

|    |   |         |          |          |
|----|---|---------|----------|----------|
| 6  | 0 | -2.3133 | 2.08453  | 0.25179  |
| 6  | 0 | -0.1776 | -2.49769 | -0.25832 |
| 6  | 0 | -1.5687 | -2.70315 | -0.16379 |
| 1  | 0 | -0.5930 | 3.37130  | 0.09787  |
| 1  | 0 | -2.9971 | 2.91635  | 0.40267  |
| 1  | 0 | -3.8424 | 0.58148  | 0.34092  |
| 1  | 0 | 0.4932  | -3.34614 | -0.36809 |
| 1  | 0 | -1.9712 | -3.71281 | -0.19363 |
| 1  | 0 | -3.4762 | -1.75689 | 0.11260  |
| 8  | 0 | 1.3018  | 1.52268  | -0.27214 |
| 6  | 0 | 1.7501  | 2.86319  | -0.41898 |
| 1  | 0 | 2.8163  | 2.78691  | -0.62765 |
| 1  | 0 | 1.2445  | 3.35827  | -1.25442 |
| 1  | 0 | 1.5951  | 3.43887  | 0.50005  |
| 16 | 0 | 2.1609  | -1.20579 | -0.38888 |
| 6  | 0 | 2.6482  | -0.73758 | 1.29233  |
| 1  | 0 | 3.7406  | -0.78463 | 1.32319  |
| 1  | 0 | 2.3214  | 0.27906  | 1.51512  |
| 1  | 0 | 2.2366  | -1.44387 | 2.01696  |

Adduct **1b (BB)**  
Symmetry  $C_1$   
energy MP2 = -2938.2530693 au  
Standard orientation

|    |   |          |          |          |
|----|---|----------|----------|----------|
| 6  | 0 | 0.81885  | 0.30961  | 0.00484  |
| 6  | 0 | 1.85774  | 1.30775  | -0.01377 |
| 6  | 0 | 1.23822  | -1.06070 | -0.02843 |
| 6  | 0 | 3.22269  | 0.91750  | 0.06765  |
| 6  | 0 | -0.55401 | 0.73643  | -0.04481 |
| 6  | 0 | 1.51322  | 2.68367  | -0.01355 |
| 6  | 0 | 2.57682  | -1.41485 | 0.05372  |
| 6  | 0 | 3.57449  | -0.41392 | 0.07617  |
| 6  | 0 | -0.83433 | 2.10176  | -0.06906 |
| 6  | 0 | 0.19137  | 3.07036  | -0.07502 |
| 1  | 0 | 2.87363  | -2.45771 | 0.03845  |
| 1  | 0 | 4.61997  | -0.70640 | 0.13745  |
| 1  | 0 | 3.98758  | 1.69122  | 0.07225  |
| 1  | 0 | -1.85985 | 2.44954  | -0.11114 |
| 1  | 0 | -0.07446 | 4.12507  | -0.08935 |
| 1  | 0 | 2.30977  | 3.42516  | -0.01196 |
| 8  | 0 | 0.22651  | -1.97065 | -0.10078 |
| 6  | 0 | 0.54596  | -3.35448 | -0.04535 |
| 1  | 0 | -0.41055 | -3.87325 | -0.08852 |
| 1  | 0 | 1.16496  | -3.64821 | -0.89915 |
| 1  | 0 | 1.06011  | -3.59852 | 0.88973  |
| 34 | 0 | -1.99848 | -0.52380 | 0.00750  |
| 6  | 0 | -3.50328 | 0.69819  | 0.11843  |
| 1  | 0 | -4.37648 | 0.04625  | 0.20401  |
| 1  | 0 | -3.44116 | 1.32831  | 1.00739  |
| 1  | 0 | -3.60357 | 1.30504  | -0.78299 |

Adduct **1b (AA)**  
Symmetry  $C_1$   
energy MP2 = -2938.2499982 au  
Standard orientation

|   |   |          |          |           |
|---|---|----------|----------|-----------|
| 6 | 0 | 0.802781 | 0.109647 | -0.037294 |
| 6 | 0 | 2.073892 | 0.794884 | 0.062549  |

|    |   |           |           |           |
|----|---|-----------|-----------|-----------|
| 6  | 0 | 0.837878  | -1.317859 | 0.080304  |
| 6  | 0 | 3.272278  | 0.062370  | 0.275756  |
| 6  | 0 | -0.381470 | 0.915500  | -0.155617 |
| 6  | 0 | 2.138423  | 2.198600  | -0.142447 |
| 6  | 0 | 2.022218  | -1.997525 | 0.319669  |
| 6  | 0 | 3.244896  | -1.306679 | 0.447607  |
| 6  | 0 | -0.264474 | 2.292264  | -0.339241 |
| 6  | 0 | 0.991098  | 2.936757  | -0.346829 |
| 1  | 0 | 1.973748  | -3.079877 | 0.414051  |
| 1  | 0 | 4.163204  | -1.858821 | 0.631091  |
| 1  | 0 | 4.210890  | 0.608862  | 0.344448  |
| 1  | 0 | -1.174182 | 2.882138  | -0.422539 |
| 1  | 0 | 1.045218  | 4.011943  | -0.500062 |
| 1  | 0 | 3.109370  | 2.688525  | -0.094360 |
| 8  | 0 | -0.303577 | -2.075123 | -0.068634 |
| 6  | 0 | -0.567364 | -2.400693 | -1.439011 |
| 1  | 0 | -1.514871 | -2.938440 | -1.450242 |
| 1  | 0 | -0.656282 | -1.492214 | -2.042493 |
| 1  | 0 | 0.234201  | -3.034449 | -1.834463 |
| 34 | 0 | -2.184828 | 0.269904  | -0.097710 |
| 6  | 0 | -2.181793 | -0.413219 | 1.722665  |
| 1  | 0 | -3.213091 | -0.698292 | 1.944653  |
| 1  | 0 | -1.531278 | -1.284361 | 1.785953  |
| 1  | 0 | -1.864317 | 0.374944  | 2.406515  |

Adduct **1b (AB)**  
Symmetry  $C_1$   
energy MP2 = -2938.2522937 au  
Standard orientation

|    |   |           |           |           |
|----|---|-----------|-----------|-----------|
| 6  | 0 | 0.857782  | 0.211942  | -0.034513 |
| 6  | 0 | 1.968853  | 1.132344  | 0.006139  |
| 6  | 0 | 1.172451  | -1.169517 | -0.203526 |
| 6  | 0 | 3.299592  | 0.639627  | -0.054874 |
| 6  | 0 | -0.479474 | 0.738516  | 0.000547  |
| 6  | 0 | 1.727239  | 2.517805  | 0.197122  |
| 6  | 0 | 2.479873  | -1.618372 | -0.289651 |
| 6  | 0 | 3.553958  | -0.705594 | -0.235852 |
| 6  | 0 | -0.661028 | 2.107386  | 0.180842  |
| 6  | 0 | 0.435262  | 2.994356  | 0.263910  |
| 1  | 0 | 4.120380  | 1.352874  | -0.009522 |
| 1  | 0 | 2.654509  | -2.680780 | -0.442273 |
| 1  | 0 | 4.576494  | -1.068674 | -0.302896 |
| 1  | 0 | 2.574102  | 3.199825  | 0.242189  |
| 1  | 0 | -1.659193 | 2.528288  | 0.221683  |
| 1  | 0 | 0.247806  | 4.056358  | 0.406229  |
| 8  | 0 | 0.143011  | -2.086169 | -0.269833 |
| 6  | 0 | -0.033608 | -2.816115 | 0.952945  |
| 1  | 0 | 0.847328  | -3.430686 | 1.163019  |
| 1  | 0 | -0.212704 | -2.125173 | 1.783114  |
| 1  | 0 | -0.906946 | -3.451254 | 0.806728  |
| 34 | 0 | -1.988754 | -0.422765 | -0.188690 |
| 6  | 0 | -3.424144 | 0.872809  | -0.008684 |
| 1  | 0 | -3.407684 | 1.360546  | 0.967545  |
| 1  | 0 | -3.402116 | 1.609936  | -0.813154 |
| 1  | 0 | -4.338957 | 0.280987  | -0.094953 |

| Adduct               | <b>1b (BA)</b>         |           |           |           |
|----------------------|------------------------|-----------|-----------|-----------|
| Symmetry             | $C_1$                  |           |           |           |
| energy               | MP2 = -2938.2488296 au |           |           |           |
| Standard orientation |                        |           |           |           |
| 6                    | 0                      | -0.798236 | -0.199792 | -0.022995 |
| 6                    | 0                      | -2.046120 | -0.926652 | 0.041759  |
| 6                    | 0                      | -0.894402 | 1.235361  | -0.066306 |
| 6                    | 0                      | -3.281665 | -0.236676 | 0.175307  |
| 6                    | 0                      | 0.414927  | -0.964469 | -0.139130 |
| 6                    | 0                      | -2.044752 | -2.346058 | 0.049134  |
| 6                    | 0                      | -2.119385 | 1.878454  | 0.064820  |
| 6                    | 0                      | -3.318559 | 1.138925  | 0.156212  |
| 6                    | 0                      | 0.355421  | -2.358897 | -0.140076 |
| 6                    | 0                      | -0.868622 | -3.055177 | -0.072190 |
| 1                    | 0                      | -2.173416 | 2.960986  | 0.044309  |
| 1                    | 0                      | -4.263941 | 1.667103  | 0.254203  |
| 1                    | 0                      | -4.200454 | -0.815823 | 0.237912  |
| 1                    | 0                      | 1.288358  | -2.912642 | -0.208109 |
| 1                    | 0                      | -0.873941 | -4.142588 | -0.073664 |
| 1                    | 0                      | -2.999604 | -2.865210 | 0.110513  |
| 8                    | 0                      | 0.277682  | 1.918087  | -0.178710 |
| 6                    | 0                      | 0.224477  | 3.326399  | -0.360951 |
| 1                    | 0                      | 1.257467  | 3.633459  | -0.519299 |
| 1                    | 0                      | -0.377374 | 3.586950  | -1.237573 |
| 1                    | 0                      | -0.177249 | 3.828610  | 0.525831  |
| 34                   | 0                      | 2.200234  | -0.275387 | -0.303287 |
| 6                    | 0                      | 2.398965  | 0.416695  | 1.503421  |
| 1                    | 0                      | 3.432793  | 0.759066  | 1.595341  |
| 1                    | 0                      | 1.713777  | 1.250325  | 1.653793  |
| 1                    | 0                      | 2.211892  | -0.380455 | 2.224133  |

| Adduct               | <b>1c (BB)</b>         |           |           |           |
|----------------------|------------------------|-----------|-----------|-----------|
| Symmetry             | $C_1$                  |           |           |           |
| energy               | MP2 = -7150.0697329 au |           |           |           |
| Standard orientation |                        |           |           |           |
| 6                    | 0                      | -1.183603 | 0.296027  | -0.016767 |
| 6                    | 0                      | -2.318181 | 1.182375  | -0.006690 |
| 6                    | 0                      | -1.459038 | -1.107591 | -0.060622 |
| 6                    | 0                      | -3.632070 | 0.650779  | 0.109146  |
| 6                    | 0                      | 0.139812  | 0.846550  | -0.082059 |
| 6                    | 0                      | -2.107321 | 2.584871  | -0.009732 |
| 6                    | 0                      | -2.747137 | -1.604979 | 0.056456  |
| 6                    | 0                      | -3.841446 | -0.711241 | 0.121509  |
| 6                    | 0                      | 0.286605  | 2.233254  | -0.110715 |
| 6                    | 0                      | -0.829249 | 3.097567  | -0.099746 |
| 1                    | 0                      | -2.932834 | -2.673400 | 0.031657  |
| 1                    | 0                      | -4.848619 | -1.111079 | 0.210773  |
| 1                    | 0                      | -4.474463 | 1.338794  | 0.139486  |
| 1                    | 0                      | 1.274440  | 2.678182  | -0.168391 |
| 1                    | 0                      | -0.668719 | 4.173352  | -0.119446 |
| 1                    | 0                      | -2.970709 | 3.247215  | 0.012668  |
| 8                    | 0                      | -0.355440 | -1.899386 | -0.199093 |
| 6                    | 0                      | -0.487277 | -3.303251 | -0.004205 |
| 1                    | 0                      | 0.526188  | -3.699474 | -0.053734 |
| 1                    | 0                      | -0.926162 | -3.517100 | 0.975135  |
| 1                    | 0                      | -1.096720 | -3.749950 | -0.795526 |
| 52                   | 0                      | 1.881079  | -0.357215 | 0.001947  |
| 6                    | 0                      | 3.270430  | 1.260242  | 0.195986  |



|   |   |          |          |           |
|---|---|----------|----------|-----------|
| 1 | 0 | 4.248591 | 0.790923 | 0.331853  |
| 1 | 0 | 3.301361 | 1.877802 | -0.702735 |
| 1 | 0 | 3.045890 | 1.867387 | 1.074410  |

Adduct  
Symmetry **1c (AA)**  
energy  $C_1$   
MP2 = -7150.0637292 au  
Standard orientation

|    |   |          |          |          |
|----|---|----------|----------|----------|
| 6  | 0 | 1.14909  | 0.13221  | 0.00241  |
| 6  | 0 | 2.42231  | 0.81951  | 0.04409  |
| 6  | 0 | 1.20386  | -1.29733 | 0.05205  |
| 6  | 0 | 3.62065  | 0.09774  | 0.29243  |
| 6  | 0 | -0.04395 | 0.91793  | -0.15228 |
| 6  | 0 | 2.46870  | 2.23196  | -0.08711 |
| 6  | 0 | 2.38674  | -1.97286 | 0.30716  |
| 6  | 0 | 3.60877  | -1.27703 | 0.41354  |
| 6  | 0 | 0.06422  | 2.30375  | -0.28714 |
| 6  | 0 | 1.31488  | 2.95836  | -0.29691 |
| 1  | 0 | 2.34994  | -3.05767 | 0.37595  |
| 1  | 0 | 4.52820  | -1.82175 | 0.61298  |
| 1  | 0 | 4.55837  | 0.64786  | 0.34289  |
| 1  | 0 | -0.84409 | 2.89566  | -0.37279 |
| 1  | 0 | 1.35511  | 4.03973  | -0.40504 |
| 1  | 0 | 3.43683  | 2.72853  | -0.05073 |
| 8  | 0 | 0.05613  | -2.04631 | -0.09441 |
| 6  | 0 | -0.13692 | -2.48663 | -1.44582 |
| 1  | 0 | -1.10033 | -2.99464 | -1.46731 |
| 1  | 0 | -0.15896 | -1.63031 | -2.12707 |
| 1  | 0 | 0.66405  | -3.17427 | -1.73724 |
| 52 | 0 | -2.04148 | 0.20928  | -0.09503 |
| 6  | 0 | -1.93773 | -0.69783 | 1.83597  |
| 1  | 0 | -2.96084 | -0.92764 | 2.14257  |
| 1  | 0 | -1.34428 | -1.60837 | 1.77411  |
| 1  | 0 | -1.50002 | 0.01248  | 2.53830  |

Adduct  
Symmetry **1c (AB)**  
energy  $C_1$   
MP2 = -7150.0676492 au  
Standard orientation

|   |   |          |          |          |
|---|---|----------|----------|----------|
| 6 | 0 | 1.19135  | 0.20525  | 0.01391  |
| 6 | 0 | 2.34687  | 1.06614  | -0.02996 |
| 6 | 0 | 1.41406  | -1.18926 | -0.18042 |
| 6 | 0 | 3.63453  | 0.50699  | -0.24851 |
| 6 | 0 | -0.11261 | 0.78947  | 0.12967  |
| 6 | 0 | 2.18885  | 2.45283  | 0.22788  |
| 6 | 0 | 2.67474  | -1.70524 | -0.42347 |
| 6 | 0 | 3.79167  | -0.84384 | -0.49319 |
| 6 | 0 | -0.21395 | 2.15589  | 0.38363  |
| 6 | 0 | 0.93083  | 2.98341  | 0.43135  |
| 1 | 0 | 4.49498  | 1.17313  | -0.27233 |
| 1 | 0 | 2.77785  | -2.77764 | -0.57141 |
| 1 | 0 | 4.77949  | -1.25594 | -0.68361 |
| 1 | 0 | 3.06713  | 3.09568  | 0.21849  |
| 1 | 0 | -1.18682 | 2.62130  | 0.50567  |
| 1 | 0 | 0.81048  | 4.04508  | 0.63582  |
| 8 | 0 | 0.35131  | -2.06347 | -0.03097 |
| 6 | 0 | 0.23605  | -2.53348 | 1.32513  |
| 1 | 0 | -0.66652 | -3.14236 | 1.36233  |

|    |   |          |          |          |
|----|---|----------|----------|----------|
| 1  | 0 | 1.11293  | -3.13473 | 1.58501  |
| 1  | 0 | 0.14510  | -1.68820 | 2.01426  |
| 52 | 0 | -1.86412 | -0.35207 | -0.19377 |
| 6  | 0 | -3.21581 | 1.30744  | -0.14244 |
| 1  | 0 | -4.19963 | 0.89316  | -0.37837 |
| 1  | 0 | -3.25678 | 1.76518  | 0.84682  |
| 1  | 0 | -2.95402 | 2.04728  | -0.90049 |

Adduct **1c (BA)**  
Symmetry  $C_1$   
energy MP2 = -7150.063828 au  
Standard orientation

|    |   |          |          |          |
|----|---|----------|----------|----------|
| 6  | 0 | -1.17557 | -0.18621 | 0.01366  |
| 6  | 0 | -2.43471 | -0.89024 | 0.07972  |
| 6  | 0 | -1.24369 | 1.24770  | 0.03392  |
| 6  | 0 | -3.66337 | -0.17898 | 0.00904  |
| 6  | 0 | 0.04016  | -0.95464 | 0.01823  |
| 6  | 0 | -2.45016 | -2.30922 | 0.10866  |
| 6  | 0 | -2.45774 | 1.91656  | -0.04714 |
| 6  | 0 | -3.67315 | 1.19749  | -0.04135 |
| 6  | 0 | -0.03889 | -2.34956 | 0.07074  |
| 6  | 0 | -1.27422 | -3.02860 | 0.13914  |
| 1  | 0 | -2.48508 | 3.00093  | -0.03987 |
| 1  | 0 | -4.61351 | 1.74026  | -0.09925 |
| 1  | 0 | -4.59553 | -0.73915 | 0.03995  |
| 1  | 0 | 0.88321  | -2.92530 | 0.07011  |
| 1  | 0 | -1.29074 | -4.11535 | 0.17653  |
| 1  | 0 | -3.41162 | -2.81878 | 0.14365  |
| 8  | 0 | -0.05216 | 1.89958  | 0.11923  |
| 6  | 0 | -0.00443 | 3.27416  | -0.24348 |
| 1  | 0 | 1.05522  | 3.52416  | -0.29055 |
| 1  | 0 | -0.46619 | 3.43315  | -1.22287 |
| 1  | 0 | -0.49699 | 3.90127  | 0.50689  |
| 52 | 0 | 2.01438  | -0.24589 | -0.31615 |
| 6  | 0 | 2.34892  | 0.63709  | 1.60185  |
| 1  | 0 | 3.40226  | 0.92391  | 1.64991  |
| 1  | 0 | 1.71030  | 1.51113  | 1.71654  |
| 1  | 0 | 2.13909  | -0.10006 | 2.37739  |

Adduct **1d (BB)**  
Symmetry  $C_1$   
energy MP2 = -3260.8289424 au  
Standard orientation

|   |   |         |          |          |
|---|---|---------|----------|----------|
| 6 | 0 | 0.63950 | 0.64519  | -0.00002 |
| 6 | 0 | 1.37183 | 1.89862  | 0.00000  |
| 6 | 0 | 1.43783 | -0.56175 | -0.00004 |
| 6 | 0 | 2.79151 | 1.91964  | 0.00000  |
| 6 | 0 | 0.80399 | 0.73616  | -0.00001 |
| 6 | 0 | 0.69107 | 3.14329  | 0.00002  |
| 6 | 0 | 2.83125 | -0.48539 | -0.00004 |
| 6 | 0 | 3.51095 | 0.74746  | -0.00002 |
| 6 | 0 | 1.41940 | 1.98875  | 0.00000  |
| 6 | 0 | 0.68378 | 3.18884  | 0.00002  |
| 1 | 0 | 3.42524 | -1.39104 | -0.00007 |
| 1 | 0 | 4.59837 | 0.76029  | -0.00003 |
| 1 | 0 | 3.29642 | 2.88346  | 0.00001  |

|    |   |         |          |          |
|----|---|---------|----------|----------|
| 1  | 0 | 2.49952 | 2.06410  | 0.00000  |
| 1  | 0 | 1.21065 | 4.14030  | 0.00003  |
| 1  | 0 | 1.27978 | 4.05838  | 0.00003  |
| 16 | 0 | 0.65990 | -2.15264 | -0.00008 |
| 6  | 0 | 2.03829 | -3.31645 | 0.00004  |
| 1  | 0 | 1.56177 | -4.30033 | -0.00030 |
| 1  | 0 | 2.65152 | -3.21919 | -0.89934 |
| 1  | 0 | 2.65103 | -3.21958 | 0.89980  |
| 34 | 0 | 1.95292 | -0.80685 | 0.00000  |
| 6  | 0 | 3.70333 | 0.03604  | 0.00018  |
| 1  | 0 | 4.39993 | -0.80643 | 0.00020  |
| 1  | 0 | 3.86167 | 0.63144  | 0.90103  |
| 1  | 0 | 3.86182 | 0.63153  | -0.90059 |

Adduct **1d (AA)**  
Symmetry  $C_1$   
energy MP2 = -3260.8324141 au  
Standard orientation

|    |   |          |          |          |
|----|---|----------|----------|----------|
| 6  | 0 | -0.84416 | 0.15733  | 0.01462  |
| 6  | 0 | -2.15486 | 0.77692  | -0.02787 |
| 6  | 0 | -0.80614 | -1.27416 | -0.13629 |
| 6  | 0 | -3.29556 | 0.02295  | -0.41164 |
| 6  | 0 | 0.27872  | 1.03601  | 0.20258  |
| 6  | 0 | -2.31483 | 2.14500  | 0.31630  |
| 6  | 0 | -1.95150 | -1.97122 | -0.52128 |
| 6  | 0 | -3.18963 | -1.32160 | -0.70282 |
| 6  | 0 | 0.07203  | 2.37288  | 0.54307  |
| 6  | 0 | -1.22298 | 2.92194  | 0.64443  |
| 1  | 0 | -1.88290 | -3.05224 | -0.61912 |
| 1  | 0 | -4.06270 | -1.89362 | -1.00729 |
| 1  | 0 | -4.25948 | 0.52638  | -0.46151 |
| 1  | 0 | 0.94049  | 3.01599  | 0.66582  |
| 1  | 0 | -1.34787 | 3.96680  | 0.91822  |
| 1  | 0 | -3.31579 | 2.57266  | 0.30238  |
| 16 | 0 | 0.60112  | -2.29060 | 0.23045  |
| 6  | 0 | 0.80932  | -1.93422 | 1.99294  |
| 1  | 0 | 1.58862  | -2.61313 | 2.35070  |
| 1  | 0 | 1.13440  | -0.90275 | 2.14680  |
| 1  | 0 | -0.12167 | -2.13296 | 2.52863  |
| 34 | 0 | 2.11498  | 0.58261  | -0.10149 |
| 6  | 0 | 1.94931  | 0.00673  | -1.94905 |
| 1  | 0 | 2.96692  | -0.05963 | -2.34198 |
| 1  | 0 | 1.46797  | -0.97120 | -1.99765 |
| 1  | 0 | 1.38636  | 0.75320  | -2.51134 |

Adduct **1d (AB)**  
Symmetry  $C_1$   
energy MP2 = -3260.8347631 au  
Standard orientation

|   |   |         |          |          |
|---|---|---------|----------|----------|
| 6 | 0 | 0.86497 | 0.32136  | -0.04876 |
| 6 | 0 | 1.93414 | 1.29576  | -0.00693 |
| 6 | 0 | 1.24757 | -1.04481 | -0.26462 |
| 6 | 0 | 3.26921 | 0.90439  | -0.29407 |
| 6 | 0 | 0.48388 | 0.80100  | 0.10888  |
| 6 | 0 | 1.66514 | 2.64173  | 0.35423  |
| 6 | 0 | 2.56754 | -1.38410 | -0.55406 |
| 6 | 0 | 3.57948 | -0.40363 | -0.60696 |

|    |   |         |          |          |
|----|---|---------|----------|----------|
| 6  | 0 | 0.69141 | 2.12331  | 0.50159  |
| 6  | 0 | 0.37406 | 3.04016  | 0.62540  |
| 1  | 0 | 4.04728 | 1.66553  | -0.27229 |
| 1  | 0 | 2.80799 | -2.43388 | -0.70540 |
| 1  | 0 | 4.60261 | -0.69011 | -0.83769 |
| 1  | 0 | 1.69700 | 2.48634  | 0.68036  |
| 1  | 0 | 0.16361 | 4.06277  | 0.93045  |
| 1  | 0 | 2.48843 | 3.35242  | 0.39147  |
| 16 | 0 | 0.11315 | -2.39152 | -0.06311 |
| 6  | 0 | 0.05931 | -2.35431 | 1.74398  |
| 1  | 0 | 0.90910 | -2.52856 | 2.21863  |
| 1  | 0 | 0.48299 | -1.40016 | 2.06615  |
| 1  | 0 | 0.74977 | -3.16057 | 2.00698  |
| 34 | 0 | 2.01222 | -0.28084 | -0.32222 |
| 6  | 0 | 3.36328 | 1.12452  | -0.41738 |
| 1  | 0 | 3.61491 | 1.52743  | 0.56511  |
| 1  | 0 | 3.05208 | 1.91889  | -1.09863 |
| 1  | 0 | 4.24240 | 0.62047  | -0.82795 |

Adduct **1d (BA)**  
Symmetry  $C_1$   
energy MP2 = -3260.8321648 au  
Standard orientation

|    |   |          |          |          |
|----|---|----------|----------|----------|
| 6  | 0 | -0.70155 | -0.48804 | -0.08208 |
| 6  | 0 | -1.80286 | -1.42212 | 0.03461  |
| 6  | 0 | -1.01723 | 0.91860  | 0.01433  |
| 6  | 0 | -3.10360 | -0.97136 | 0.38144  |
| 6  | 0 | 0.60381  | -1.05677 | -0.27041 |
| 6  | 0 | -1.59940 | -2.80453 | -0.21841 |
| 6  | 0 | -2.30085 | 1.30498  | 0.40500  |
| 6  | 0 | -3.33618 | 0.36802  | 0.60196  |
| 6  | 0 | 0.75686  | -2.42114 | -0.51390 |
| 6  | 0 | -0.34740 | -3.29708 | -0.52269 |
| 1  | 0 | -2.53556 | 2.35504  | 0.53355  |
| 1  | 0 | -4.32198 | 0.71816  | 0.89932  |
| 1  | 0 | -3.90624 | -1.70059 | 0.47141  |
| 1  | 0 | 1.76243  | -2.81429 | -0.64262 |
| 1  | 0 | -0.20031 | -4.35551 | -0.72350 |
| 1  | 0 | -2.45495 | -3.47415 | -0.14964 |
| 16 | 0 | 0.15796  | 2.15763  | -0.47682 |
| 6  | 0 | -0.88176 | 3.63208  | -0.63602 |
| 1  | 0 | -0.22267 | 4.37614  | -1.09204 |
| 1  | 0 | -1.73044 | 3.45103  | -1.30079 |
| 1  | 0 | -1.22318 | 4.01660  | 0.32807  |
| 34 | 0 | 2.24297  | -0.08605 | -0.09076 |
| 6  | 0 | 2.05252  | 0.33408  | 1.80124  |
| 1  | 0 | 2.98808  | 0.80742  | 2.10941  |
| 1  | 0 | 1.22419  | 1.02985  | 1.94493  |
| 1  | 0 | 1.89810  | -0.58626 | 2.36626  |

Adduct **1e (BB)**  
Symmetry  $C_s$   
energy MP2 = -7472.6434694 au  
Standard orientation

|   |   |          |         |         |
|---|---|----------|---------|---------|
| 6 | 0 | -1.21721 | 0.19635 | 0.00000 |
| 6 | 0 | -2.47267 | 0.92554 | 0.00000 |

|    |   |          |          |          |
|----|---|----------|----------|----------|
| 6  | 0 | -1.32213 | -1.24483 | 0.00000  |
| 6  | 0 | -3.71840 | 0.24307  | 0.00000  |
| 6  | 0 | 0.00000  | 0.97561  | 0.00000  |
| 6  | 0 | -2.49070 | 2.34330  | 0.00000  |
| 6  | 0 | -2.56827 | -1.87052 | 0.00000  |
| 6  | 0 | -3.76734 | -1.13169 | 0.00000  |
| 6  | 0 | -0.08435 | 2.37094  | 0.00000  |
| 6  | 0 | -1.31375 | 3.05650  | 0.00000  |
| 1  | 0 | -2.63519 | -2.95196 | 0.00000  |
| 1  | 0 | -4.72035 | -1.65548 | 0.00000  |
| 1  | 0 | -4.63298 | 0.83264  | 0.00000  |
| 1  | 0 | 0.81766  | 2.97079  | 0.00000  |
| 1  | 0 | -1.32066 | 4.14416  | 0.00000  |
| 1  | 0 | -3.45245 | 2.85252  | 0.00000  |
| 16 | 0 | 0.14715  | -2.22434 | 0.00000  |
| 6  | 0 | -0.44636 | -3.92762 | 0.00000  |
| 1  | 0 | 0.46259  | -4.53459 | 0.00000  |
| 1  | 0 | -1.02420 | -4.15072 | 0.90018  |
| 1  | 0 | -1.02420 | -4.15072 | -0.90018 |
| 52 | 0 | 1.99546  | 0.21011  | 0.00000  |
| 6  | 0 | 3.02162  | 2.08874  | 0.00000  |
| 1  | 0 | 4.08237  | 1.82195  | 0.00000  |
| 1  | 0 | 2.80335  | 2.66639  | -0.89949 |
| 1  | 0 | 2.80335  | 2.66639  | 0.89949  |

Adduct  
Symmetry  
energy  
Standard orientation

**1e (AA)**  
 $C_1$   
MP2 = -7472.6464814 au

|    |   |          |          |          |
|----|---|----------|----------|----------|
| 6  | 0 | -1.15148 | 0.20822  | 0.01254  |
| 6  | 0 | -2.40400 | 0.93557  | -0.06940 |
| 6  | 0 | -1.23895 | -1.22282 | -0.11837 |
| 6  | 0 | -3.58889 | 0.28153  | -0.50078 |
| 6  | 0 | 0.04028  | 0.97867  | 0.24542  |
| 6  | 0 | -2.45469 | 2.31694  | 0.25118  |
| 6  | 0 | -2.42285 | -1.82416 | -0.54383 |
| 6  | 0 | -3.59261 | -1.07106 | -0.77385 |
| 6  | 0 | -0.06594 | 2.33595  | 0.56168  |
| 6  | 0 | -1.31160 | 2.99435  | 0.62285  |
| 1  | 0 | -2.44456 | -2.90818 | -0.62979 |
| 1  | 0 | -4.49969 | -1.56640 | -1.11144 |
| 1  | 0 | -4.50357 | 0.86576  | -0.58617 |
| 1  | 0 | 0.84367  | 2.91377  | 0.71059  |
| 1  | 0 | -1.35221 | 4.04953  | 0.88257  |
| 1  | 0 | -3.41383 | 2.82967  | 0.20345  |
| 16 | 0 | 0.06461  | -2.33902 | 0.32233  |
| 6  | 0 | 0.18362  | -2.00466 | 2.09773  |
| 1  | 0 | 0.92455  | -2.70621 | 2.49124  |
| 1  | 0 | 0.52759  | -0.98310 | 2.27696  |
| 1  | 0 | -0.78145 | -2.17989 | 2.57839  |
| 52 | 0 | 2.04190  | 0.34855  | -0.06841 |
| 6  | 0 | 1.73878  | -0.46842 | -2.01679 |
| 1  | 0 | 2.70307  | -0.45911 | -2.53011 |
| 1  | 0 | 1.35725  | -1.48735 | -1.94056 |
| 1  | 0 | 1.03687  | 0.17035  | -2.55556 |

| Adduct               |   | <b>1e (AB)</b>         |          |          |
|----------------------|---|------------------------|----------|----------|
| Symmetry             |   | $C_1$                  |          |          |
| energy               |   | MP2 = -7472.6523368 au |          |          |
| Standard orientation |   |                        |          |          |
| 6                    | 0 | 1.18810                | 0.33302  | -0.05095 |
| 6                    | 0 | 2.29908                | 1.25868  | -0.01379 |
| 6                    | 0 | 1.51329                | -1.04696 | -0.26559 |
| 6                    | 0 | 3.60209                | 0.82026  | -0.37289 |
| 6                    | 0 | -0.13455               | 0.84254  | 0.18482  |
| 6                    | 0 | 2.08231                | 2.62014  | 0.32232  |
| 6                    | 0 | 2.80392                | -1.44226 | -0.60659 |
| 6                    | 0 | 3.85280                | -0.50198 | -0.68181 |
| 6                    | 0 | -0.28376               | 2.17794  | 0.56276  |
| 6                    | 0 | 0.81788                | 3.05554  | 0.65907  |
| 1                    | 0 | 4.41273                | 1.54710  | -0.36869 |
| 1                    | 0 | 2.99757                | -2.50051 | -0.76678 |
| 1                    | 0 | 4.85323                | -0.82495 | -0.95911 |
| 1                    | 0 | 2.93202                | 3.29983  | 0.34611  |
| 1                    | 0 | -1.26855               | 2.57125  | 0.79117  |
| 1                    | 0 | 0.65043                | 4.08966  | 0.95207  |
| 16                   | 0 | 0.31726                | -2.32719 | -0.01108 |
| 6                    | 0 | 0.31186                | -2.34755 | 1.80534  |
| 1                    | 0 | -0.43972               | -3.08179 | 2.10791  |
| 1                    | 0 | 1.29450                | -2.64449 | 2.17899  |
| 1                    | 0 | 0.03147                | -1.36409 | 2.19001  |
| 52                   | 0 | -1.91336               | -0.24481 | -0.24456 |
| 6                    | 0 | -3.18244               | 1.49309  | -0.30515 |
| 1                    | 0 | -4.13438               | 1.13479  | -0.70771 |
| 1                    | 0 | -3.36005               | 1.91565  | 0.68511  |
| 1                    | 0 | -2.77402               | 2.24774  | -0.98018 |

| Adduct               |   | <b>1e (BA)</b>         |          |          |
|----------------------|---|------------------------|----------|----------|
| Symmetry             |   | $C_1$                  |          |          |
| energy               |   | MP2 = -7472.6444515 au |          |          |
| Standard orientation |   |                        |          |          |
| 6                    | 0 | -1.03388               | -0.48997 | -0.08396 |
| 6                    | 0 | -2.14920               | -1.40615 | 0.04857  |
| 6                    | 0 | -1.33929               | 0.91931  | 0.00176  |
| 6                    | 0 | -3.42836               | -0.94047 | 0.45328  |
| 6                    | 0 | 0.26191                | -1.07104 | -0.30800 |
| 6                    | 0 | -1.97393               | -2.79042 | -0.21053 |
| 6                    | 0 | -2.60015               | 1.32552  | 0.44116  |
| 6                    | 0 | -3.63897               | 0.40171  | 0.67863  |
| 6                    | 0 | 0.37962                | -2.44029 | -0.56237 |
| 6                    | 0 | -0.74061               | -3.29556 | -0.56589 |
| 1                    | 0 | -2.81800               | 2.38016  | 0.56414  |
| 1                    | 0 | -4.60743               | 0.76252  | 1.01727  |
| 1                    | 0 | -4.23785               | -1.65937 | 0.56356  |
| 1                    | 0 | 1.37038                | -2.86383 | -0.70920 |
| 1                    | 0 | -0.61351               | -4.35466 | -0.77699 |
| 1                    | 0 | -2.83833               | -3.44687 | -0.12659 |
| 16                   | 0 | -0.17737               | 2.13399  | -0.56796 |
| 6                    | 0 | -1.21452               | 3.60793  | -0.74947 |
| 1                    | 0 | -0.57098               | 4.32795  | -1.26235 |
| 1                    | 0 | -2.08905               | 3.40012  | -1.37136 |
| 1                    | 0 | -1.51554               | 4.03352  | 0.21059  |
| 52                   | 0 | 2.12372                | -0.09248 | -0.04716 |
| 6                    | 0 | 1.70581                | 0.53912  | 1.95371  |

|   |   |         |          |         |
|---|---|---------|----------|---------|
| 1 | 0 | 2.64789 | 0.87428  | 2.39426 |
| 1 | 0 | 0.98940 | 1.36150  | 1.93497 |
| 1 | 0 | 1.31700 | -0.30823 | 2.51983 |

Adduct **1f (BB)**  
Symmetry  $C_s$   
energy MP2 = -9475.0096778 au

Standard orientation

|    |   |          |          |          |
|----|---|----------|----------|----------|
| 6  | 0 | -1.22715 | 0.48919  | 0.00000  |
| 6  | 0 | -2.46835 | 1.24681  | 0.00000  |
| 6  | 0 | -1.36515 | -0.94805 | 0.00000  |
| 6  | 0 | -3.72911 | 0.59408  | 0.00000  |
| 6  | 0 | 0.00000  | 1.25256  | 0.00000  |
| 6  | 0 | -2.46045 | 2.66503  | 0.00000  |
| 6  | 0 | -2.62615 | -1.54218 | 0.00000  |
| 6  | 0 | -3.80943 | -0.77897 | 0.00000  |
| 6  | 0 | -0.05614 | 2.64882  | 0.00000  |
| 6  | 0 | -1.27198 | 3.35786  | 0.00000  |
| 1  | 0 | -2.72069 | -2.62140 | 0.00000  |
| 1  | 0 | -4.77356 | -1.28209 | 0.00000  |
| 1  | 0 | -4.62955 | 1.20509  | 0.00000  |
| 1  | 0 | 0.85770  | 3.23065  | 0.00000  |
| 1  | 0 | -1.25923 | 4.44543  | 0.00000  |
| 1  | 0 | -3.41339 | 3.19055  | 0.00000  |
| 34 | 0 | 0.16204  | -2.10142 | 0.00000  |
| 6  | 0 | -0.67535 | -3.85350 | 0.00000  |
| 1  | 0 | 0.16610  | -4.55037 | 0.00000  |
| 1  | 0 | -1.27078 | -4.00396 | 0.90183  |
| 1  | 0 | -1.27078 | -4.00396 | -0.90183 |
| 52 | 0 | 1.97820  | 0.45080  | 0.00000  |
| 6  | 0 | 3.04817  | 2.30398  | 0.00000  |
| 1  | 0 | 4.10222  | 2.01268  | 0.00000  |
| 1  | 0 | 2.84130  | 2.88500  | -0.89989 |
| 1  | 0 | 2.84130  | 2.88500  | 0.89989  |

Adduct **1f (AA)**  
Symmetry  $C_1$   
energy MP2 = -9475.0138284 au

Standard orientation

|    |   |          |          |          |
|----|---|----------|----------|----------|
| 6  | 0 | 1.18564  | 0.41312  | 0.00535  |
| 6  | 0 | 2.46988  | 1.08943  | 0.04285  |
| 6  | 0 | 1.21311  | -1.00780 | 0.22460  |
| 6  | 0 | 3.61969  | 0.42057  | 0.54009  |
| 6  | 0 | 0.03231  | 1.22213  | -0.28359 |
| 6  | 0 | 2.58397  | 2.43935  | -0.37906 |
| 6  | 0 | 2.36449  | -1.62715 | 0.70860  |
| 6  | 0 | 3.56120  | -0.90795 | 0.90821  |
| 6  | 0 | 0.19999  | 2.54537  | -0.70053 |
| 6  | 0 | 1.47508  | 3.13722  | -0.81206 |
| 1  | 0 | 2.35134  | -2.70464 | 0.85625  |
| 1  | 0 | 4.44094  | -1.41581 | 1.29603  |
| 1  | 0 | 4.55869  | 0.96901  | 0.59279  |
| 1  | 0 | -0.68225 | 3.15326  | -0.88940 |
| 1  | 0 | 1.56506  | 4.16653  | -1.15108 |
| 1  | 0 | 3.56557  | 2.90991  | -0.36339 |
| 34 | 0 | -0.20257 | -2.20664 | -0.23471 |

|    |   |          |          |          |
|----|---|----------|----------|----------|
| 6  | 0 | -0.31530 | -1.76187 | -2.12235 |
| 1  | 0 | -0.96708 | -2.51270 | -2.57580 |
| 1  | 0 | -0.75127 | -0.76912 | -2.24948 |
| 1  | 0 | 0.67957  | -1.81591 | -2.56666 |
| 52 | 0 | -1.98774 | 0.72033  | 0.12052  |
| 6  | 0 | -1.66482 | 0.01418  | 2.10851  |
| 1  | 0 | -2.60710 | 0.11872  | 2.65125  |
| 1  | 0 | -1.35032 | -1.03039 | 2.08982  |
| 1  | 0 | -0.90470 | 0.64002  | 2.57922  |

Adduct **1f (AB)**  
Symmetry  $C_1$   
energy MP2 = -9475.0198784 au  
Standard orientation

|    |   |          |          |          |
|----|---|----------|----------|----------|
| 6  | 0 | 1.11843  | 0.66427  | -0.05804 |
| 6  | 0 | 2.15566  | 1.67332  | -0.01647 |
| 6  | 0 | 1.54925  | -0.67961 | -0.30554 |
| 6  | 0 | 3.47705  | 1.35226  | -0.42768 |
| 6  | 0 | -0.23270 | 1.06940  | 0.21741  |
| 6  | 0 | 1.84599  | 3.00193  | 0.37476  |
| 6  | 0 | 2.85618  | -0.96182 | -0.69258 |
| 6  | 0 | 3.82251  | 0.06270  | -0.77897 |
| 6  | 0 | -0.47131 | 2.37339  | 0.65452  |
| 6  | 0 | 0.56368  | 3.32730  | 0.76351  |
| 1  | 0 | 4.22753  | 2.14105  | -0.42239 |
| 1  | 0 | 3.13899  | -1.99672 | -0.87044 |
| 1  | 0 | 4.83609  | -0.17229 | -1.09461 |
| 1  | 0 | 2.64307  | 3.74259  | 0.40205  |
| 1  | 0 | -1.47805 | 2.68090  | 0.91732  |
| 1  | 0 | 0.32804  | 4.33316  | 1.10406  |
| 34 | 0 | 0.40890  | -2.17512 | 0.01269  |
| 6  | 0 | 0.42825  | -2.03224 | 1.95682  |
| 1  | 0 | -0.21685 | -2.82779 | 2.33695  |
| 1  | 0 | 1.44749  | -2.16469 | 2.32237  |
| 1  | 0 | 0.02739  | -1.06025 | 2.24977  |
| 52 | 0 | -1.94886 | -0.09650 | -0.26627 |
| 6  | 0 | -3.27294 | 1.59935  | -0.39208 |
| 1  | 0 | -4.17909 | 1.21765  | -0.87145 |
| 1  | 0 | -3.53818 | 1.99815  | 0.58832  |
| 1  | 0 | -2.83835 | 2.37852  | -1.02151 |

Adduct **1f (BA)**  
Symmetry  $C_1$   
energy MP2 = -9475.0144161 au  
Standard orientation

|   |   |          |          |          |
|---|---|----------|----------|----------|
| 6 | 0 | 1.06422  | 0.75333  | -0.02791 |
| 6 | 0 | 2.18683  | 1.66177  | 0.08890  |
| 6 | 0 | 1.37486  | -0.63306 | -0.24735 |
| 6 | 0 | 3.50393  | 1.22553  | -0.21593 |
| 6 | 0 | -0.25013 | 1.31055  | 0.13113  |
| 6 | 0 | 1.97339  | 3.01967  | 0.44431  |
| 6 | 0 | 2.67366  | -1.00943 | -0.58309 |
| 6 | 0 | 3.74021  | -0.08584 | -0.56846 |
| 6 | 0 | -0.40625 | 2.65373  | 0.48005  |
| 6 | 0 | 0.70383  | 3.49790  | 0.69371  |
| 1 | 0 | 2.88557  | -2.04854 | -0.81745 |



|    |   |          |          |          |
|----|---|----------|----------|----------|
| 1  | 0 | 4.74183  | -0.41683 | -0.83306 |
| 1  | 0 | 4.32259  | 1.93900  | -0.14251 |
| 1  | 0 | -1.41078 | 3.06231  | 0.56308  |
| 1  | 0 | 0.54824  | 4.53666  | 0.97518  |
| 1  | 0 | 2.83868  | 3.67427  | 0.53504  |
| 34 | 0 | 0.11603  | -2.05328 | 0.05122  |
| 6  | 0 | 1.36718  | -3.30648 | 0.89218  |
| 1  | 0 | 0.73977  | -4.02689 | 1.42336  |
| 1  | 0 | 1.97160  | -3.83486 | 0.15421  |
| 1  | 0 | 2.00114  | -2.77273 | 1.60244  |
| 52 | 0 | -2.03041 | 0.34789  | -0.49232 |
| 6  | 0 | -2.69318 | -0.28991 | 1.43817  |
| 1  | 0 | -3.72517 | -0.63413 | 1.33570  |
| 1  | 0 | -2.05128 | -1.10093 | 1.78501  |
| 1  | 0 | -2.65717 | 0.55735  | 2.12400  |

Adduct  
Symmetry  
energy  
Standard orientation

**1g (BB)**

$C_1$

MP2 = -613.2962322 au

|   |   |          |          |          |
|---|---|----------|----------|----------|
| 6 | 0 | 0.00000  | -0.27520 | -0.03342 |
| 6 | 0 | 0.00000  | -1.71312 | 0.02358  |
| 6 | 0 | 1.27444  | 0.39127  | 0.00190  |
| 6 | 0 | 1.22772  | -2.42826 | 0.00024  |
| 6 | 0 | -1.27444 | 0.39127  | 0.00192  |
| 6 | 0 | -1.22772 | -2.42826 | 0.00025  |
| 6 | 0 | 2.45346  | -0.34461 | -0.02054 |
| 6 | 0 | 2.42859  | -1.75636 | 0.00903  |
| 6 | 0 | -2.45346 | -0.34461 | -0.02053 |
| 6 | 0 | -2.42859 | -1.75636 | 0.00904  |
| 1 | 0 | 1.20021  | -3.51549 | 0.02533  |
| 1 | 0 | -1.20021 | -3.51549 | 0.02533  |
| 1 | 0 | 3.41352  | 0.15774  | -0.00693 |
| 1 | 0 | 3.36760  | -2.30474 | -0.00529 |
| 1 | 0 | -3.41352 | 0.15774  | -0.00690 |
| 1 | 0 | -3.36760 | -2.30474 | -0.00528 |
| 8 | 0 | 1.26175  | 1.75495  | -0.00939 |
| 6 | 0 | 2.51179  | 2.42658  | 0.01448  |
| 1 | 0 | 3.08137  | 2.17845  | 0.91664  |
| 1 | 0 | 3.10868  | 2.19008  | -0.87305 |
| 1 | 0 | 2.26710  | 3.48758  | 0.01716  |
| 8 | 0 | -1.26175 | 1.75495  | -0.00935 |
| 6 | 0 | -2.51180 | 2.42658  | 0.01444  |
| 1 | 0 | -3.10864 | 2.19005  | -0.87311 |
| 1 | 0 | -3.08141 | 2.17848  | 0.91659  |
| 1 | 0 | -2.26711 | 3.48758  | 0.01710  |

Adduct  
Symmetry  
energy  
Standard orientation

**1g (AA)**

$C_1$

MP2 = -613.2974524 au

|   |   |          |          |          |
|---|---|----------|----------|----------|
| 6 | 0 | -0.24841 | 0.00182  | -0.03039 |
| 6 | 0 | -1.69084 | -0.01588 | 0.01896  |
| 6 | 0 | 0.42028  | -1.26163 | -0.11262 |
| 6 | 0 | -2.38788 | -1.23620 | -0.19052 |
| 6 | 0 | 0.40242  | 1.26688  | 0.13098  |

|   |   |          |          |          |
|---|---|----------|----------|----------|
| 6 | 0 | -2.40742 | 1.20054  | 0.17781  |
| 6 | 0 | -0.29264 | -2.43025 | -0.32257 |
| 6 | 0 | -1.70415 | -2.42504 | -0.34753 |
| 6 | 0 | -0.33152 | 2.42799  | 0.30963  |
| 6 | 0 | -1.74183 | 2.39529  | 0.36540  |
| 1 | 0 | -3.47606 | -1.22386 | -0.18062 |
| 1 | 0 | -3.49494 | 1.16640  | 0.19969  |
| 1 | 0 | 0.26925  | -3.35644 | -0.41680 |
| 1 | 0 | -2.24532 | -3.35365 | -0.51123 |
| 1 | 0 | 0.21593  | 3.35995  | 0.42854  |
| 1 | 0 | -2.29812 | 3.31912  | 0.50349  |
| 8 | 0 | 1.79546  | -1.35462 | -0.08104 |
| 6 | 0 | 2.32199  | -1.31122 | 1.25170  |
| 1 | 0 | 2.05844  | -0.37248 | 1.74354  |
| 1 | 0 | 1.94518  | -2.16230 | 1.82959  |
| 1 | 0 | 3.40511  | -1.38075 | 1.15220  |
| 8 | 0 | 1.77513  | 1.38524  | 0.08303  |
| 6 | 0 | 2.28726  | 1.34417  | -1.25497 |
| 1 | 0 | 2.05918  | 0.38763  | -1.72956 |
| 1 | 0 | 1.86568  | 2.16927  | -1.83962 |
| 1 | 0 | 3.36736  | 1.46333  | -1.17044 |

Adduct  
Symmetry  
energy  
Standard orientation

**1g (AB)**  
 $C_1$   
MP2 = -613.2961814 au

|   |   |          |          |          |
|---|---|----------|----------|----------|
| 6 | 0 | -0.25120 | 0.14213  | -0.04278 |
| 6 | 0 | -1.17431 | 1.24696  | 0.03174  |
| 6 | 0 | 1.15237  | 0.45148  | -0.07012 |
| 6 | 0 | -0.68731 | 2.56960  | 0.21701  |
| 6 | 0 | -0.80614 | -1.16503 | -0.23396 |
| 6 | 0 | -2.57347 | 1.00562  | 0.00323  |
| 6 | 0 | 1.59109  | 1.75642  | 0.11136  |
| 6 | 0 | 0.66630  | 2.81941  | 0.22878  |
| 6 | 0 | -2.17871 | -1.35472 | -0.28278 |
| 6 | 0 | -3.07105 | -0.26706 | -0.18906 |
| 1 | 0 | -1.40209 | 3.38614  | 0.29377  |
| 1 | 0 | 2.65031  | 1.98664  | 0.10552  |
| 1 | 0 | 1.03760  | 3.83235  | 0.36502  |
| 1 | 0 | -3.24865 | 1.85570  | 0.07930  |
| 1 | 0 | -2.54068 | -2.36867 | -0.43511 |
| 1 | 0 | -4.14365 | -0.44052 | -0.22869 |
| 8 | 0 | 2.00686  | -0.60341 | -0.21455 |
| 6 | 0 | 3.39241  | -0.31687 | -0.34369 |
| 1 | 0 | 3.79422  | 0.13429  | 0.56997  |
| 1 | 0 | 3.58006  | 0.34573  | -1.19485 |
| 1 | 0 | 3.87081  | -1.27965 | -0.51603 |
| 8 | 0 | -0.01834 | -2.28778 | -0.36181 |
| 6 | 0 | 0.42081  | -2.80205 | 0.89662  |
| 1 | 0 | 1.02272  | -2.06499 | 1.43411  |
| 1 | 0 | -0.44227 | -3.09370 | 1.50641  |
| 1 | 0 | 1.02857  | -3.67916 | 0.67339  |

Adduct  
Symmetry  
energy

**1h (BB)**  
 $C_{2v}$   
MP2 = -1258.4606397 au

## Standard orientation

|    |   |         |          |          |
|----|---|---------|----------|----------|
| 6  | 0 | 0.00000 | 0.00000  | 0.59845  |
| 6  | 0 | 0.00000 | 0.00000  | 2.04919  |
| 6  | 0 | 0.00000 | 1.29661  | -0.04785 |
| 6  | 0 | 0.00000 | 1.21512  | 2.78281  |
| 6  | 0 | 0.00000 | -1.29661 | -0.04785 |
| 6  | 0 | 0.00000 | -1.21512 | 2.78281  |
| 6  | 0 | 0.00000 | 2.45982  | 0.72469  |
| 6  | 0 | 0.00000 | 2.42647  | 2.13177  |
| 6  | 0 | 0.00000 | -2.45982 | 0.72469  |
| 6  | 0 | 0.00000 | -2.42647 | 2.13177  |
| 1  | 0 | 0.00000 | 3.43030  | 0.24466  |
| 1  | 0 | 0.00000 | 3.35998  | 2.68970  |
| 1  | 0 | 0.00000 | 1.16603  | 3.86974  |
| 1  | 0 | 0.00000 | -3.43030 | 0.24466  |
| 1  | 0 | 0.00000 | -3.35998 | 2.68970  |
| 1  | 0 | 0.00000 | -1.16603 | 3.86974  |
| 16 | 0 | 0.00000 | 1.44290  | -1.81721 |
| 6  | 0 | 0.00000 | 3.22486  | -2.10274 |
| 1  | 0 | 0.00000 | 3.32164  | -3.19186 |
| 1  | 0 | 0.89930 | 3.70288  | -1.70599 |
| 1  | 0 | 0.89930 | 3.70288  | -1.70599 |
| 16 | 0 | 0.00000 | -1.44290 | -1.81721 |
| 6  | 0 | 0.00000 | -3.22486 | -2.10274 |
| 1  | 0 | 0.00000 | -3.32164 | -3.19186 |
| 1  | 0 | 0.89930 | -3.70288 | -1.70599 |
| 1  | 0 | 0.89930 | -3.70288 | -1.70599 |

Adduct  
Symmetry  
energy**1h (AA)** $C_2$ 

MP2 = -1258.4643572 au

## Standard orientation

|    |   |          |          |          |
|----|---|----------|----------|----------|
| 6  | 0 | 0.00000  | 0.00000  | 0.55681  |
| 6  | 0 | 0.00000  | 0.00000  | 2.00635  |
| 6  | 0 | 0.00000  | 1.28739  | -0.08840 |
| 6  | 0 | -0.19865 | 1.20802  | 2.72616  |
| 6  | 0 | 0.00000  | -1.28739 | -0.08840 |
| 6  | 0 | 0.19865  | -1.20802 | 2.72616  |
| 6  | 0 | -0.20565 | 2.44608  | 0.66118  |
| 6  | 0 | -0.34672 | 2.40910  | 2.06353  |
| 6  | 0 | 0.20565  | -2.44608 | 0.66118  |
| 6  | 0 | 0.34672  | -2.40910 | 2.06353  |
| 1  | 0 | -0.19392 | 3.40030  | 0.13947  |
| 1  | 0 | -0.50955 | 3.33108  | 2.61637  |
| 1  | 0 | -0.22125 | 1.16869  | 3.81377  |
| 1  | 0 | 0.19392  | -3.40030 | 0.13947  |
| 1  | 0 | 0.50955  | -3.33108 | 2.61637  |
| 1  | 0 | 0.22125  | -1.16869 | 3.81377  |
| 16 | 0 | 0.33411  | 1.56442  | -1.81019 |
| 6  | 0 | 2.02149  | 0.91918  | -1.92584 |
| 1  | 0 | 2.37742  | 1.17667  | -2.92746 |
| 1  | 0 | 2.65862  | 1.39886  | -1.17941 |
| 1  | 0 | 2.03262  | -0.16660 | -1.80897 |
| 16 | 0 | -0.33411 | -1.56442 | -1.81019 |
| 6  | 0 | -2.02149 | -0.91918 | -1.92584 |
| 1  | 0 | -2.37742 | -1.17667 | -2.92746 |
| 1  | 0 | -2.65862 | -1.39886 | -1.17941 |
| 1  | 0 | -2.03262 | 0.16660  | -1.80897 |

|                      |   |                        |          |          |
|----------------------|---|------------------------|----------|----------|
| Adduct               |   | <b>1h (AB)</b>         |          |          |
| Symmetry             |   | $C_1$                  |          |          |
| energy               |   | MP2 = -1258.4637719 au |          |          |
| Standard orientation |   |                        |          |          |
| 6                    | 0 | 0.52560                | 0.35922  | -0.10841 |
| 6                    | 0 | 1.55632                | 1.35905  | 0.09221  |
| 6                    | 0 | 0.96859                | -1.00528 | -0.21198 |
| 6                    | 0 | 2.92085                | 0.97916  | 0.19517  |
| 6                    | 0 | -0.84338               | 0.82203  | -0.15252 |
| 6                    | 0 | 1.23443                | 2.74123  | 0.12296  |
| 6                    | 0 | 2.32192                | -1.32722 | -0.10551 |
| 6                    | 0 | 3.30296                | -0.34401 | 0.12705  |
| 6                    | 0 | -1.09974               | 2.19454  | -0.14489 |
| 6                    | 0 | -0.07437               | 3.15011  | 0.00207  |
| 1                    | 0 | 3.66354                | 1.76105  | 0.34396  |
| 1                    | 0 | 2.60767                | -2.37044 | -0.22042 |
| 1                    | 0 | 4.35019                | -0.62559 | 0.20540  |
| 1                    | 0 | -2.11784               | 2.55442  | -0.23379 |
| 1                    | 0 | -0.32789               | 4.20772  | 0.00470  |
| 1                    | 0 | 2.03501                | 3.46415  | 0.26582  |
| 16                   | 0 | -0.09787               | -2.36927 | -0.61521 |
| 6                    | 0 | -0.49905               | -2.96883 | 1.04882  |
| 1                    | 0 | 0.41725                | -3.20550 | 1.59465  |
| 1                    | 0 | -1.09022               | -2.22330 | 1.58579  |
| 1                    | 0 | -1.09085               | -3.87965 | 0.91900  |
| 16                   | 0 | -2.21806               | -0.30587 | -0.18565 |
| 6                    | 0 | -3.59719               | 0.75757  | 0.31548  |
| 1                    | 0 | -3.37067               | 1.30012  | 1.23725  |
| 1                    | 0 | -3.90164               | 1.45102  | -0.47202 |
| 1                    | 0 | -4.42136               | 0.06288  | 0.50074  |

|                      |   |                        |          |          |
|----------------------|---|------------------------|----------|----------|
| Adduct               |   | <b>1h (CC)</b>         |          |          |
| Symmetry             |   | $C_2$                  |          |          |
| energy               |   | MP2 = -1258.4623005 au |          |          |
| Standard orientation |   |                        |          |          |
| 6                    | 0 | 0.00000                | 0.00000  | 0.56719  |
| 6                    | 0 | 0.00000                | 0.00000  | 2.01373  |
| 6                    | 0 | 0.00000                | 1.28017  | -0.09123 |
| 6                    | 0 | -0.11549               | 1.21922  | 2.73257  |
| 6                    | 0 | 0.00000                | -1.28017 | -0.09123 |
| 6                    | 0 | 0.11549                | -1.21922 | 2.73257  |
| 6                    | 0 | -0.16254               | 2.44605  | 0.65682  |
| 6                    | 0 | -0.21754               | 2.42115  | 2.06499  |
| 6                    | 0 | 0.16254                | -2.44605 | 0.65682  |
| 6                    | 0 | 0.21754                | -2.42115 | 2.06499  |
| 1                    | 0 | -0.11251               | 1.18640  | 3.82038  |
| 1                    | 0 | 0.11251                | -1.18640 | 3.82038  |
| 1                    | 0 | -0.21396               | 3.40386  | 0.14800  |
| 1                    | 0 | -0.33357               | 3.35224  | 2.61480  |
| 1                    | 0 | 0.21396                | -3.40386 | 0.14800  |
| 1                    | 0 | 0.33357                | -3.35224 | 2.61480  |
| 16                   | 0 | 0.32193                | 1.42234  | -1.83327 |
| 6                    | 0 | 1.27131                | 2.96722  | -1.89467 |
| 1                    | 0 | 0.63352                | 3.85077  | -1.82546 |
| 1                    | 0 | 2.02854                | 2.98158  | -1.10693 |

|    |   |          |          |          |
|----|---|----------|----------|----------|
| 1  | 0 | 1.76183  | 2.96692  | -2.87207 |
| 16 | 0 | -0.32193 | -1.42234 | -1.83327 |
| 6  | 0 | -1.27131 | -2.96722 | -1.89467 |
| 1  | 0 | -0.63352 | -3.85077 | -1.82546 |
| 1  | 0 | -2.02854 | -2.98158 | -1.10693 |
| 1  | 0 | -1.76183 | -2.96692 | -2.87207 |

Adduct **1i (BB)**  
Symmetry  $C_{2v}$   
energy MP2 = -5263.1951649 au

Standard orientation

|    |   |          |          |          |
|----|---|----------|----------|----------|
| 6  | 0 | 0.00000  | 0.00000  | 1.08841  |
| 6  | 0 | 0.00000  | 0.00000  | 2.54154  |
| 6  | 0 | 0.00000  | 1.29558  | 0.44792  |
| 6  | 0 | 0.00000  | 1.21469  | 3.27528  |
| 6  | 0 | 0.00000  | -1.29558 | 0.44792  |
| 6  | 0 | 0.00000  | -1.21469 | 3.27528  |
| 6  | 0 | 0.00000  | 2.45894  | 1.21749  |
| 6  | 0 | 0.00000  | 2.42664  | 2.62484  |
| 6  | 0 | 0.00000  | -2.45894 | 1.21749  |
| 6  | 0 | 0.00000  | -2.42664 | 2.62484  |
| 1  | 0 | 0.00000  | 3.42950  | 0.73698  |
| 1  | 0 | 0.00000  | 3.35996  | 3.18314  |
| 1  | 0 | 0.00000  | 1.16496  | 4.36226  |
| 1  | 0 | 0.00000  | -3.42950 | 0.73698  |
| 1  | 0 | 0.00000  | -3.35996 | 3.18314  |
| 1  | 0 | 0.00000  | -1.16496 | 4.36226  |
| 34 | 0 | 0.00000  | 1.49930  | -1.46037 |
| 6  | 0 | 0.00000  | 3.43343  | -1.63312 |
| 1  | 0 | 0.00000  | 3.60306  | -2.71284 |
| 1  | 0 | -0.90100 | 3.87186  | -1.20064 |
| 1  | 0 | 0.90100  | 3.87186  | -1.20064 |
| 34 | 0 | 0.00000  | -1.49930 | -1.46037 |
| 6  | 0 | 0.00000  | -3.43343 | -1.63312 |
| 1  | 0 | 0.00000  | -3.60306 | -2.71284 |
| 1  | 0 | 0.90100  | -3.87186 | -1.20064 |
| 1  | 0 | -0.90100 | -3.87186 | -1.20064 |

Adduct **1i (AA)**  
Symmetry  $C_2$   
energy MP2 = -5263.198665 au

Standard orientation

|   |   |          |          |         |
|---|---|----------|----------|---------|
| 6 | 0 | 0.00000  | 0.00000  | 1.03162 |
| 6 | 0 | 0.00000  | 0.00000  | 2.48299 |
| 6 | 0 | 0.00000  | 1.28767  | 0.39125 |
| 6 | 0 | -0.21996 | 1.20421  | 3.20215 |
| 6 | 0 | 0.00000  | -1.28767 | 0.39125 |
| 6 | 0 | 0.21996  | -1.20421 | 3.20215 |
| 6 | 0 | -0.22325 | 2.44416  | 1.13812 |
| 6 | 0 | -0.38164 | 2.40321  | 2.53883 |
| 6 | 0 | 0.22325  | -2.44416 | 1.13812 |
| 6 | 0 | 0.38164  | -2.40321 | 2.53883 |
| 1 | 0 | -0.20343 | 3.40342  | 0.62593 |
| 1 | 0 | -0.56145 | 3.32271  | 3.09063 |
| 1 | 0 | -0.24494 | 1.16434  | 4.28975 |
| 1 | 0 | 0.20343  | -3.40342 | 0.62593 |

|    |   |          |          |          |
|----|---|----------|----------|----------|
| 1  | 0 | 0.56145  | -3.32271 | 3.09063  |
| 1  | 0 | 0.24494  | -1.16434 | 4.28975  |
| 34 | 0 | 0.43960  | 1.61093  | -1.44331 |
| 6  | 0 | 2.19132  | 0.77242  | -1.44958 |
| 1  | 0 | 2.67796  | 1.08511  | -2.37676 |
| 1  | 0 | 2.76574  | 1.12948  | -0.59352 |
| 1  | 0 | 2.09107  | -0.31413 | -1.43190 |
| 34 | 0 | -0.43960 | -1.61093 | -1.44331 |
| 6  | 0 | -2.19132 | -0.77242 | -1.44958 |
| 1  | 0 | -2.67796 | -1.08511 | -2.37676 |
| 1  | 0 | -2.76574 | -1.12948 | -0.59352 |
| 1  | 0 | -2.09107 | 0.31413  | -1.43190 |

Adduct **1i (AB)**  
Symmetry  $C_1$   
energy MP2 = -5263.2008851 au

Standard orientation

|    |   |          |          |          |
|----|---|----------|----------|----------|
| 6  | 0 | 0.83726  | 0.65033  | -0.05038 |
| 6  | 0 | 1.86247  | 1.67244  | -0.00806 |
| 6  | 0 | 1.27875  | -0.69231 | -0.29224 |
| 6  | 0 | 3.20808  | 1.34909  | -0.32690 |
| 6  | 0 | -0.52766 | 1.07434  | 0.12782  |
| 6  | 0 | 1.54303  | 2.99554  | 0.39510  |
| 6  | 0 | 2.60775  | -0.96539 | -0.60861 |
| 6  | 0 | 3.57012  | 0.06345  | -0.67395 |
| 6  | 0 | -0.78530 | 2.37390  | 0.56386  |
| 6  | 0 | 0.24208  | 3.33131  | 0.70109  |
| 1  | 0 | 3.95046  | 2.14510  | -0.30572 |
| 1  | 0 | 2.90267  | -1.99946 | -0.77038 |
| 1  | 0 | 4.60057  | -0.17242 | -0.92848 |
| 1  | 0 | -1.80374 | 2.68701  | 0.76433  |
| 1  | 0 | -0.00544 | 4.33451  | 1.04072  |
| 1  | 0 | 2.33624  | 3.73954  | 0.43577  |
| 34 | 0 | 0.15836  | -2.21657 | -0.02563 |
| 6  | 0 | -0.02673 | -2.01243 | 1.90329  |
| 1  | 0 | 0.95928  | -2.02986 | 2.36970  |
| 1  | 0 | -0.55158 | -1.08165 | 2.12505  |
| 1  | 0 | -0.62079 | -2.86109 | 2.25096  |
| 34 | 0 | -2.02145 | -0.03797 | -0.34680 |
| 6  | 0 | -3.38487 | 1.35169  | -0.50608 |
| 1  | 0 | -3.70346 | 1.73698  | 0.46384  |
| 1  | 0 | -3.03918 | 2.15978  | -1.15371 |
| 1  | 0 | -4.22983 | 0.84402  | -0.97907 |

Adduct **1i (CC)**  
Symmetry  $C_2$   
energy MP2 = -5263.1998938 au

Standard orientation

|   |   |          |          |         |
|---|---|----------|----------|---------|
| 6 | 0 | 0.00000  | 0.00000  | 1.03345 |
| 6 | 0 | 0.00000  | 0.00000  | 2.47902 |
| 6 | 0 | 0.00000  | 1.27194  | 0.37309 |
| 6 | 0 | -0.13831 | 1.22153  | 3.19060 |
| 6 | 0 | 0.00000  | -1.27194 | 0.37309 |
| 6 | 0 | 0.13831  | -1.22153 | 3.19060 |
| 6 | 0 | -0.18406 | 2.44121  | 1.10626 |
| 6 | 0 | -0.25797 | 2.41946  | 2.51577 |

|    |   |          |          |          |
|----|---|----------|----------|----------|
| 6  | 0 | 0.18406  | -2.44121 | 1.10626  |
| 6  | 0 | 0.25797  | -2.41946 | 2.51577  |
| 1  | 0 | -0.14373 | 1.19540  | 4.27880  |
| 1  | 0 | 0.14373  | -1.19540 | 4.27880  |
| 1  | 0 | -0.23562 | 3.39423  | 0.58553  |
| 1  | 0 | -0.39350 | 3.34983  | 3.06237  |
| 1  | 0 | 0.23562  | -3.39423 | 0.58553  |
| 1  | 0 | 0.39350  | -3.34983 | 3.06237  |
| 34 | 0 | 0.44915  | 1.45473  | -1.48316 |
| 6  | 0 | 1.80935  | 2.83907  | -1.24652 |
| 1  | 0 | 1.35961  | 3.81332  | -1.05419 |
| 1  | 0 | 2.47660  | 2.55442  | -0.43167 |
| 1  | 0 | 2.36640  | 2.87612  | -2.18605 |
| 34 | 0 | -0.44915 | -1.45473 | -1.48316 |
| 6  | 0 | -1.80935 | -2.83907 | -1.24652 |
| 1  | 0 | -1.35961 | -3.81332 | -1.05419 |
| 1  | 0 | -2.47660 | -2.55442 | -0.43167 |
| 1  | 0 | -2.36640 | -2.87612 | -2.18605 |

Adduct **1j (BB)**  
Symmetry  $C_{2v}$   
energy MP2 = -13686.8213291 au  
Standard orientation

|    |   |          |          |          |
|----|---|----------|----------|----------|
| 6  | 0 | 0.00000  | 0.00000  | 1.46703  |
| 6  | 0 | 0.00000  | 0.00000  | 2.92320  |
| 6  | 0 | 0.00000  | 1.29663  | 0.83018  |
| 6  | 0 | 0.00000  | 1.21228  | 3.66033  |
| 6  | 0 | 0.00000  | -1.29663 | 0.83018  |
| 6  | 0 | 0.00000  | -1.21228 | 3.66033  |
| 6  | 0 | 0.00000  | 2.45786  | 1.60632  |
| 6  | 0 | 0.00000  | 2.42577  | 3.01344  |
| 6  | 0 | 0.00000  | -2.45786 | 1.60632  |
| 6  | 0 | 0.00000  | -2.42577 | 3.01344  |
| 1  | 0 | 0.00000  | 3.43154  | 1.13107  |
| 1  | 0 | 0.00000  | 3.35842  | 3.57292  |
| 1  | 0 | 0.00000  | 1.15880  | 4.74726  |
| 1  | 0 | 0.00000  | -3.43154 | 1.13107  |
| 1  | 0 | 0.00000  | -3.35842 | 3.57292  |
| 1  | 0 | 0.00000  | -1.15880 | 4.74726  |
| 52 | 0 | 0.00000  | 1.64043  | -1.27174 |
| 6  | 0 | 0.00000  | 3.78040  | -1.22898 |
| 1  | 0 | 0.00000  | 4.07733  | -2.28112 |
| 1  | 0 | -0.90067 | 4.16543  | -0.74898 |
| 1  | 0 | 0.90067  | 4.16543  | -0.74898 |
| 52 | 0 | 0.00000  | -1.64043 | -1.27174 |
| 6  | 0 | 0.00000  | -3.78040 | -1.22898 |
| 1  | 0 | 0.00000  | -4.07733 | -2.28112 |
| 1  | 0 | 0.90067  | -4.16543 | -0.74898 |
| 1  | 0 | -0.90067 | -4.16543 | -0.74898 |

Adduct **1j (AA)**  
Symmetry  $C_2$   
energy MP2 = -13686.8262908 au  
Standard orientation

|   |   |         |         |         |
|---|---|---------|---------|---------|
| 6 | 0 | 0.00000 | 0.00000 | 1.39147 |
| 6 | 0 | 0.00000 | 0.00000 | 2.84394 |

|    |   |          |          |          |
|----|---|----------|----------|----------|
| 6  | 0 | 1.26091  | 0.25683  | 0.75016  |
| 6  | 0 | 1.22451  | -0.00632 | 3.56136  |
| 6  | 0 | -1.26091 | -0.25683 | 0.75016  |
| 6  | 0 | -1.22451 | 0.00632  | 3.56136  |
| 6  | 0 | 2.44048  | 0.24485  | 1.49815  |
| 6  | 0 | 2.43194  | 0.05219  | 2.89527  |
| 6  | 0 | -2.44048 | -0.24485 | 1.49815  |
| 6  | 0 | -2.43194 | -0.05219 | 2.89527  |
| 1  | 0 | 3.38304  | 0.46283  | 1.00046  |
| 1  | 0 | 3.37019  | 0.03356  | 3.44462  |
| 1  | 0 | 1.19166  | -0.04367 | 4.64896  |
| 1  | 0 | -3.38304 | -0.46283 | 1.00046  |
| 1  | 0 | -3.37019 | -0.03356 | 3.44462  |
| 1  | 0 | -1.19166 | 0.04367  | 4.64896  |
| 52 | 0 | 1.50952  | 0.95988  | -1.23020 |
| 6  | 0 | 0.00000  | 2.46491  | -1.12333 |
| 1  | 0 | 0.26209  | 3.24767  | -1.83856 |
| 1  | 0 | -0.97323 | 2.03535  | -1.36748 |
| 1  | 0 | -0.00133 | 2.87890  | -0.11357 |
| 52 | 0 | -1.50952 | -0.95988 | -1.23020 |
| 6  | 0 | 0.00000  | -2.46491 | -1.12333 |
| 1  | 0 | -0.26209 | -3.24767 | -1.83856 |
| 1  | 0 | 0.97323  | -2.03535 | -1.36748 |
| 1  | 0 | 0.00133  | -2.87890 | -0.11357 |

Adduct  
Symmetry **1j (AB)**  
energy  $C_1$   
Standard orientation MP2 = -13686.8308478 au

|    |   |          |          |          |
|----|---|----------|----------|----------|
| 6  | 0 | -0.76277 | 1.18189  | -0.06919 |
| 6  | 0 | -1.43282 | 2.46443  | -0.01234 |
| 6  | 0 | 0.63299  | 1.14183  | 0.27093  |
| 6  | 0 | -0.75847 | 3.60475  | 0.49862  |
| 6  | 0 | -1.57502 | 0.04856  | -0.40355 |
| 6  | 0 | -2.75606 | 2.59693  | -0.51054 |
| 6  | 0 | 1.23086  | 2.27399  | 0.82616  |
| 6  | 0 | 0.53261  | 3.49309  | 0.96945  |
| 6  | 0 | -2.87736 | 0.21676  | -0.87334 |
| 6  | 0 | -3.45923 | 1.49909  | -0.96436 |
| 1  | 0 | 2.26926  | 2.23729  | 1.14042  |
| 1  | 0 | 1.03913  | 4.35163  | 1.40480  |
| 1  | 0 | -1.28889 | 4.55428  | 0.54154  |
| 1  | 0 | -3.47383 | -0.66103 | -1.11045 |
| 1  | 0 | -4.47004 | 1.60960  | -1.34962 |
| 1  | 0 | -3.22093 | 3.58139  | -0.49382 |
| 52 | 0 | 1.96649  | -0.41579 | -0.31433 |
| 6  | 0 | 3.65230  | 0.91958  | -0.50759 |
| 1  | 0 | 4.39135  | 0.36865  | -1.09614 |
| 1  | 0 | 3.35630  | 1.81889  | -1.05122 |
| 1  | 0 | 4.09176  | 1.17813  | 0.45672  |
| 52 | 0 | -0.98635 | -1.92677 | 0.04188  |
| 6  | 0 | -0.91912 | -1.55778 | 2.14966  |
| 1  | 0 | -0.68002 | -2.50252 | 2.64302  |
| 1  | 0 | -0.13717 | -0.82496 | 2.35422  |
| 1  | 0 | -1.89187 | -1.19644 | 2.48438  |



| Adduct               | <b>1j (CC)</b>          |          |          |          |
|----------------------|-------------------------|----------|----------|----------|
| Symmetry             | $C_1$                   |          |          |          |
| energy               | MP2 = -13686.8313053 au |          |          |          |
| Standard orientation |                         |          |          |          |
| 6                    | 0                       | -0.00515 | 1.38614  | 0.00571  |
| 6                    | 0                       | -0.00149 | 2.83206  | -0.00897 |
| 6                    | 0                       | -1.19963 | 0.72284  | -0.42557 |
| 6                    | 0                       | -1.11318 | 3.54223  | -0.53614 |
| 6                    | 0                       | 1.19863  | 0.72829  | 0.41970  |
| 6                    | 0                       | 1.09576  | 3.54613  | 0.54304  |
| 6                    | 0                       | -2.24792 | 1.45645  | -0.97842 |
| 6                    | 0                       | -2.19920 | 2.86618  | -1.05398 |
| 6                    | 0                       | 2.24055  | 1.46466  | 0.98079  |
| 6                    | 0                       | 2.19028  | 2.87477  | 1.04868  |
| 1                    | 0                       | -3.13191 | 0.93601  | -1.34103 |
| 1                    | 0                       | -3.03434 | 3.41201  | -1.48693 |
| 1                    | 0                       | -1.08195 | 4.63045  | -0.54506 |
| 1                    | 0                       | 3.12954  | 0.94829  | 1.33690  |
| 1                    | 0                       | 3.01728  | 3.42324  | 1.49378  |
| 1                    | 0                       | 1.06523  | 4.63441  | 0.54192  |
| 52                   | 0                       | -1.64732 | -1.29326 | 0.05533  |
| 6                    | 0                       | -3.39443 | -0.71520 | 1.17097  |
| 1                    | 0                       | -3.72938 | -1.59423 | 1.72734  |
| 1                    | 0                       | -3.11912 | 0.07753  | 1.86788  |
| 1                    | 0                       | -4.18945 | -0.37975 | 0.50470  |
| 52                   | 0                       | 1.65136  | -1.28764 | -0.05599 |
| 6                    | 0                       | 3.40243  | -0.70656 | -1.16403 |
| 1                    | 0                       | 3.73910  | -1.58418 | -1.72157 |
| 1                    | 0                       | 3.12956  | 0.08797  | -1.85986 |
| 1                    | 0                       | 4.19543  | -0.37302 | -0.49440 |

| Adduct               | <b>2'b (BB)</b>        |          |          |          |
|----------------------|------------------------|----------|----------|----------|
| Symmetry             | $C_1$                  |          |          |          |
| energy               | MP2 = -3129.4526195 au |          |          |          |
| Standard orientation |                        |          |          |          |
| 6                    | 0                      | -1.16748 | 0.92553  | 0.00001  |
| 6                    | 0                      | -1.90331 | 2.16547  | 0.00001  |
| 6                    | 0                      | 0.25745  | 1.03123  | 0.00001  |
| 6                    | 0                      | -1.21161 | 3.40726  | 0.00003  |
| 6                    | 0                      | -1.89226 | -0.31750 | -0.00001 |
| 6                    | 0                      | -3.32167 | 2.14029  | 0.00001  |
| 6                    | 0                      | 0.91531  | 2.25031  | 0.00002  |
| 6                    | 0                      | 0.16666  | 3.44766  | 0.00003  |
| 6                    | 0                      | -3.28562 | -0.28098 | -0.00001 |
| 6                    | 0                      | -3.99667 | 0.93827  | -0.00001 |
| 1                    | 0                      | -1.79170 | 4.32770  | 0.00003  |
| 1                    | 0                      | 2.00046  | 2.27985  | 0.00003  |
| 1                    | 0                      | 0.68890  | 4.40132  | 0.00004  |
| 1                    | 0                      | -3.86484 | 3.08324  | 0.00001  |
| 1                    | 0                      | -3.85827 | -1.20105 | -0.00002 |
| 1                    | 0                      | -5.08426 | 0.91780  | -0.00001 |
| 34                   | 0                      | -0.98172 | -2.00581 | -0.00003 |
| 6                    | 0                      | -2.50905 | -3.20432 | -0.00005 |
| 1                    | 0                      | -3.11594 | -3.08420 | 0.89899  |
| 1                    | 0                      | -3.11594 | -3.08417 | -0.89909 |
| 1                    | 0                      | -2.06857 | -4.20467 | -0.00007 |
| 8                    | 0                      | 0.92793  | -0.17035 | 0.00001  |
| 6                    | 0                      | 2.31405  | -0.15845 | 0.00001  |

|   |   |         |          |          |
|---|---|---------|----------|----------|
| 6 | 0 | 2.99125 | -0.18963 | -1.22039 |
| 6 | 0 | 2.99124 | -0.18965 | 1.22042  |
| 6 | 0 | 4.38924 | -0.24020 | -1.21310 |
| 6 | 0 | 4.38923 | -0.24022 | 1.21314  |
| 6 | 0 | 5.08797 | -0.2644  | 0.00002  |
| 1 | 0 | 2.42063 | -0.1771  | -2.14533 |
| 1 | 0 | 2.42061 | -0.17714 | 2.14535  |
| 1 | 0 | 4.93088 | -0.26894 | -2.15507 |
| 1 | 0 | 4.93086 | -0.26898 | 2.15511  |
| 1 | 0 | 6.17375 | -0.30732 | 0.00003  |

Adduct  
Symmetry  
energy  
Standard orientation

**2'b (AA)**  
 $C_1$   
MP2 = -3129.4543488 au

|    |   |          |          |          |
|----|---|----------|----------|----------|
| 6  | 0 | 1.37913  | 0.30931  | 0.08462  |
| 6  | 0 | 2.67390  | 0.86170  | -0.25458 |
| 6  | 0 | 0.52879  | 1.14620  | 0.87322  |
| 6  | 0 | 3.04647  | 2.15725  | 0.19463  |
| 6  | 0 | 1.08882  | -1.03190 | -0.34085 |
| 6  | 0 | 3.54319  | 0.14421  | -1.11843 |
| 6  | 0 | 0.92577  | 2.39761  | 1.31324  |
| 6  | 0 | 2.20452  | 2.90034  | 0.99730  |
| 6  | 0 | 1.98111  | -1.69446 | -1.18224 |
| 6  | 0 | 3.20290  | -1.11040 | -1.58006 |
| 1  | 0 | 4.02759  | 2.54016  | -0.07947 |
| 1  | 0 | 0.21901  | 2.97329  | 1.90574  |
| 1  | 0 | 2.50112  | 3.88573  | 1.34728  |
| 1  | 0 | 4.50121  | 0.58929  | -1.38118 |
| 1  | 0 | 1.74104  | -2.70857 | -1.49244 |
| 1  | 0 | 3.87201  | -1.65613 | -2.24105 |
| 34 | 0 | -0.47425 | -2.03458 | 0.12612  |
| 6  | 0 | -0.11851 | -2.20977 | 2.03176  |
| 1  | 0 | 0.86274  | -2.66117 | 2.18402  |
| 1  | 0 | -0.18462 | -1.23305 | 2.51048  |
| 1  | 0 | -0.89222 | -2.87194 | 2.42851  |
| 8  | 0 | -0.74405 | 0.74697  | 1.23942  |
| 6  | 0 | -1.74736 | 0.90394  | 0.29800  |
| 6  | 0 | -1.52205 | 1.37688  | -0.99776 |
| 6  | 0 | -3.02691 | 0.53086  | 0.72107  |
| 6  | 0 | -2.60843 | 1.46617  | -1.87873 |
| 6  | 0 | -4.09726 | 0.62684  | -0.16901 |
| 6  | 0 | -3.89205 | 1.08882  | -1.47581 |
| 1  | 0 | -0.52734 | 1.67048  | -1.31955 |
| 1  | 0 | -3.15837 | 0.1656   | 1.73631  |
| 1  | 0 | -2.43947 | 1.83042  | -2.88928 |
| 1  | 0 | -5.09204 | 0.33427  | 0.15796  |
| 1  | 0 | -4.72575 | 1.15997  | -2.16884 |

Adduct  
Symmetry  
energy  
Standard orientation

**2'b (AB)**  
 $C_1$   
MP2 = -3129.4565006 au

|   |   |         |          |          |
|---|---|---------|----------|----------|
| 6 | 0 | 1.38429 | -0.56867 | -0.15606 |
| 6 | 0 | 2.57055 | -1.32183 | 0.17838  |
| 6 | 0 | 0.30701 | -1.30696 | -0.72329 |

|    |   |          |          |          |
|----|---|----------|----------|----------|
| 6  | 0 | 2.58270  | -2.73325 | 0.01883  |
| 6  | 0 | 1.39135  | 0.85829  | 0.02052  |
| 6  | 0 | 3.68646  | -0.65644 | 0.74937  |
| 6  | 0 | 0.34705  | -2.68013 | -0.88862 |
| 6  | 0 | 1.50356  | -3.40121 | -0.52773 |
| 6  | 0 | 2.51944  | 1.46099  | 0.57238  |
| 6  | 0 | 3.66628  | 0.71203  | 0.91723  |
| 1  | 0 | 3.48372  | -3.27852 | 0.29334  |
| 1  | 0 | -0.51870 | -3.17286 | -1.32463 |
| 1  | 0 | 1.53095  | -4.48019 | -0.65699 |
| 1  | 0 | 4.57062  | -1.23563 | 1.00819  |
| 1  | 0 | 2.55092  | 2.53494  | 0.71740  |
| 1  | 0 | 4.52412  | 1.22509  | 1.34634  |
| 34 | 0 | -0.14010 | 1.90354  | -0.44623 |
| 6  | 0 | 0.45060  | 3.64413  | 0.17569  |
| 1  | 0 | 0.65760  | 3.63404  | 1.24734  |
| 1  | 0 | 1.31466  | 4.00284  | -0.38622 |
| 1  | 0 | -0.39756 | 4.30572  | -0.01764 |
| 8  | 0 | -0.82798 | -0.63193 | -1.14162 |
| 6  | 0 | -1.94090 | -0.69572 | -0.31586 |
| 6  | 0 | -1.87599 | -1.10424 | 1.01949  |
| 6  | 0 | -3.13675 | -0.24736 | -0.88384 |
| 6  | 0 | -3.04827 | -1.08064 | 1.78506  |
| 6  | 0 | -4.29526 | -0.22698 | -0.10385 |
| 6  | 0 | -4.2556  | -0.64105 | 1.23347  |
| 1  | 0 | -0.93567 | -1.43092 | 1.45377  |
| 1  | 0 | -3.1377  | 0.07132  | -1.92283 |
| 1  | 0 | -3.00745 | -1.39723 | 2.82447  |
| 1  | 0 | -5.22872 | 0.1168   | -0.54249 |
| 1  | 0 | -5.15853 | -0.62618 | 1.83757  |
